# Supplementary material for: Identification of transforming growth factor beta induced (TGFBI) as an immune-related prognostic factor in clear cell renal cell carcinoma (ccRCC)
Source: Aging (Albany NY). 2020 May 14;12(9):8484–505. doi: 10.18632/aging.103153 (PMC7244045; doi:10.18632/aging.103153)
Supplement: Supplementary Table 1 [file aging-12-103153-s001..xlsx]

## Sheet: Sheet1
Supplementary Table 1. Stromal score and immune score of each patient with KIRC (based on TCGA-KIRC).
Symbol ID	StromalScore	ImmuneScore	ESTIMATEScore	TumorPurity
TCGA-3Z-A93Z	594.147	626.327	1220.47	0.707997
TCGA-6D-AA2E	-35.4425	82.9514	47.5089	0.818523
TCGA-A3-3306	-119.125	661.705	542.579	0.774652
TCGA-A3-3307	461.481	1059.6	1521.08	0.676156
TCGA-A3-3308	1135.12	744.739	1879.86	0.636435
TCGA-A3-3311	864.27	1157.11	2021.38	0.620276
TCGA-A3-3313	-161.138	-305.782	-466.919	0.859529
TCGA-A3-3316	1387.93	939.674	2327.61	0.584402
TCGA-A3-3317	971.944	934.112	1906.06	0.633464
TCGA-A3-3319	0.84596	1004.24	1005.09	0.729967
TCGA-A3-3320	445.174	606.212	1051.39	0.725305
TCGA-A3-3322	660.771	396.911	1057.68	0.724669
TCGA-A3-3323	995.601	1363.74	2359.34	0.580616
TCGA-A3-3324	536.342	1048.58	1584.92	0.669222
TCGA-A3-3325	907.828	908.35	1816.18	0.643617
TCGA-A3-3326	470.757	1716.83	2187.59	0.600956
TCGA-A3-3328	-1424.29	-787.911	-2212.2	0.960983
TCGA-A3-3329	492.525	1138.59	1631.11	0.664168
TCGA-A3-3331	746.854	1075.17	1822.02	0.642961
TCGA-A3-3335	-67.4959	422.922	355.426	0.791731
TCGA-A3-3343	254.724	1425.68	1680.4	0.658742
TCGA-A3-3346	-31.1604	1435.45	1404.29	0.688686
TCGA-A3-3347	1543.9	1768.89	3312.79	0.461362
TCGA-A3-3349	1335.9	813.673	2149.57	0.605407
TCGA-A3-3351	726.416	1847.75	2574.16	0.554658
TCGA-A3-3352	391.925	965.4	1357.33	0.693668
TCGA-A3-3357	148.47	1233.37	1381.84	0.691072
TCGA-A3-3358	899.996	1689.82	2589.82	0.552745
TCGA-A3-3359	616.751	1319.73	1936.49	0.630002
TCGA-A3-3362	803.34	419.574	1222.91	0.707744
TCGA-A3-3363	-262.596	406.97	144.373	0.810272
TCGA-A3-3365	1030.85	796.556	1827.41	0.642355
TCGA-A3-3367	469.214	844.275	1313.49	0.698289
TCGA-A3-3370	959.701	1481.68	2441.38	0.57077
TCGA-A3-3372	715.439	960.935	1676.37	0.659187
TCGA-A3-3373	777.238	663.707	1440.95	0.684775
TCGA-A3-3374	108.085	1436.83	1544.91	0.673574
TCGA-A3-3376	1359.01	1148.87	2507.88	0.562727
TCGA-A3-3378	854.66	2033.93	2888.59	0.515677
TCGA-A3-3380	714.8	664.561	1379.36	0.691335
TCGA-A3-3382	491.666	923.63	1415.3	0.687514
TCGA-A3-3383	362.561	1506.68	1869.24	0.637637
TCGA-A3-3385	-155.837	-75.5908	-231.428	0.841352
TCGA-A3-3387	1160.62	1290.74	2451.36	0.569566
TCGA-A3-A6NI	345.998	801.358	1147.36	0.715536
TCGA-A3-A6NJ	573.884	1655.21	2229.09	0.596075
TCGA-A3-A6NL	856.231	1225.99	2082.23	0.613245
TCGA-A3-A6NN	840.38	1035.86	1876.24	0.636844
TCGA-A3-A8CQ	651.579	430.892	1082.47	0.722157
TCGA-A3-A8OU	600.377	854.327	1454.7	0.683302
TCGA-A3-A8OV	57.2201	631.763	688.984	0.760884
TCGA-A3-A8OW	458.196	634.954	1093.15	0.721071
TCGA-A3-A8OX	986.805	1122.61	2109.41	0.610088
TCGA-AK-3425	1190.14	1776.42	2966.55	0.505838
TCGA-AK-3426	1118.57	2920.81	4039.39	0.364294
TCGA-AK-3427	-1163.24	-575.264	-1738.5	0.939443
TCGA-AK-3428	441.522	861.545	1303.07	0.699383
TCGA-AK-3429	389.767	1723.55	2113.32	0.609634
TCGA-AK-3431	1359.92	874.08	2234	0.595497
TCGA-AK-3433	-834.103	-519.643	-1353.75	0.9186
TCGA-AK-3434	610.96	958.276	1569.24	0.670931
TCGA-AK-3436	182.876	373.459	556.335	0.773374
TCGA-AK-3440	-1187.29	-566.847	-1754.14	0.940227
TCGA-AK-3443	-1376.36	-918.71	-2295.07	0.964277
TCGA-AK-3445	759.908	1397.96	2157.87	0.604437
TCGA-AK-3447	-994.493	-255.798	-1250.29	0.912493
TCGA-AK-3450	162.569	333.985	496.554	0.778907
TCGA-AK-3451	475.208	1155.97	1631.17	0.664162
TCGA-AK-3453	118.947	1969.36	2088.31	0.61254
TCGA-AK-3454	981.114	1010.68	1991.8	0.623676
TCGA-AK-3455	-104.953	1446.21	1341.26	0.695365
TCGA-AK-3456	-326.579	361.819	35.2403	0.819556
TCGA-AK-3458	-90.4576	685.926	595.468	0.769719
TCGA-AK-3460	659.034	793.051	1452.09	0.683583
TCGA-AK-3461	684.14	800.406	1484.55	0.680097
TCGA-AK-3465	-381.273	-846.053	-1227.33	0.911109
TCGA-AS-3777	-425.487	-257.58	-683.067	0.87531
TCGA-AS-3778	767.038	650.14	1417.18	0.687313
TCGA-B0-4688	193.812	606.415	800.226	0.750187
TCGA-B0-4690	1138.5	1894.7	3033.2	0.497375
TCGA-B0-4691	590.505	1283.77	1874.27	0.637067
TCGA-B0-4693	255.552	1318.98	1574.53	0.670354
TCGA-B0-4694	1174.71	2066.25	3240.96	0.470691
TCGA-B0-4696	43.9633	-332.005	-288.042	0.845815
TCGA-B0-4697	999.317	2612.19	3611.51	0.422029
TCGA-B0-4698	-472.486	1769.78	1297.29	0.699988
TCGA-B0-4699	435.372	1187.98	1623.35	0.665019
TCGA-B0-4700	1459.5	2170.08	3629.58	0.419622
TCGA-B0-4701	439.952	1230.09	1670.04	0.659886
TCGA-B0-4703	1496.9	1364.8	2861.7	0.519055
TCGA-B0-4706	181.838	485.412	667.25	0.76295
TCGA-B0-4707	-23.0865	168.861	145.775	0.810152
TCGA-B0-4710	615.381	734.81	1350.19	0.694422
TCGA-B0-4712	973.913	1475.2	2449.11	0.569837
TCGA-B0-4713	-35.0818	681.987	646.905	0.764877
TCGA-B0-4714	626.008	1996.16	2622.16	0.548782
TCGA-B0-4718	425.898	876.413	1302.31	0.699462
TCGA-B0-4810	1110.26	1586.6	2696.86	0.539583
TCGA-B0-4811	274.792	391.679	666.47	0.763024
TCGA-B0-4813	270.946	365.412	636.358	0.765874
TCGA-B0-4814	469.231	279.76	748.991	0.755139
TCGA-B0-4815	798.326	2343.48	3141.8	0.483482
TCGA-B0-4816	961.479	1638.42	2599.9	0.55151
TCGA-B0-4817	-308.956	1345.3	1036.34	0.726824
TCGA-B0-4818	494.066	1137.83	1631.89	0.664083
TCGA-B0-4819	1188.53	2695.6	3884.13	0.385421
TCGA-B0-4821	-296.779	499.254	202.475	0.805245
TCGA-B0-4822	953.761	1160.91	2114.67	0.609476
TCGA-B0-4823	1113.64	1144.33	2257.96	0.592667
TCGA-B0-4824	717.821	1618.21	2336.03	0.583398
TCGA-B0-4827	1297.68	1380.83	2678.51	0.541848
TCGA-B0-4828	-513.076	454.377	-58.699	0.827379
TCGA-B0-4833	482.213	1210.73	1692.94	0.657356
TCGA-B0-4834	-600.997	-764.192	-1365.19	0.919263
TCGA-B0-4836	759.979	1274.68	2034.66	0.618746
TCGA-B0-4837	851.639	567.392	1419.03	0.687116
TCGA-B0-4838	440.925	1712.5	2153.43	0.604956
TCGA-B0-4839	844.098	1321.37	2165.47	0.603548
TCGA-B0-4841	855.441	684.619	1540.06	0.6741
TCGA-B0-4842	566.463	1671.28	2237.75	0.595055
TCGA-B0-4843	957.219	628.197	1585.42	0.669168
TCGA-B0-4844	42.1859	685.851	728.037	0.757152
TCGA-B0-4845	215.159	315.206	530.365	0.775785
TCGA-B0-4846	801.216	1252.76	2053.97	0.616516
TCGA-B0-4847	4.36172	2048.4	2052.76	0.616655
TCGA-B0-4848	954.568	1293.31	2247.88	0.593859
TCGA-B0-4849	462.745	970.639	1433.38	0.685584
TCGA-B0-4852	474.438	598.895	1073.33	0.723084
TCGA-B0-4945	484.967	494.991	979.959	0.732483
TCGA-B0-5075	231.13	1562.71	1793.83	0.646124
TCGA-B0-5077	285.134	737.25	1022.38	0.72823
TCGA-B0-5080	1454.41	1229.26	2683.67	0.541212
TCGA-B0-5081	1243.59	2425.41	3669	0.414363
TCGA-B0-5083	1206.99	1143.51	2350.5	0.581673
TCGA-B0-5084	-486.782	127.034	-359.748	0.851383
TCGA-B0-5085	53.5246	521.23	574.754	0.771657
TCGA-B0-5088	1040.42	1396.07	2436.49	0.571359
TCGA-B0-5092	579.86	2215.88	2795.74	0.527306
TCGA-B0-5094	-209.568	275.607	66.039	0.816957
TCGA-B0-5095	1423.61	883.78	2307.39	0.586807
TCGA-B0-5096	878.829	1285.93	2164.76	0.603631
TCGA-B0-5097	1559.08	1310.73	2869.81	0.518037
TCGA-B0-5098	-1530.11	-1109.36	-2639.47	0.976431
TCGA-B0-5099	-159.549	-405.163	-564.712	0.866777
TCGA-B0-5100	902.24	52.6816	954.921	0.73498
TCGA-B0-5102	-51.5335	484.69	433.157	0.784709
TCGA-B0-5104	215.772	558.81	774.582	0.752671
TCGA-B0-5106	779.593	1435.94	2215.53	0.597673
TCGA-B0-5107	-757.545	1214.28	456.731	0.782559
TCGA-B0-5108	1576.63	1906.09	3482.72	0.43909
TCGA-B0-5109	186.074	1433.86	1619.93	0.665394
TCGA-B0-5110	935.486	699.651	1635.14	0.663726
TCGA-B0-5113	790.478	1078.63	1869.1	0.637652
TCGA-B0-5115	801.185	850.177	1651.36	0.661943
TCGA-B0-5116	455.436	-22.1072	433.329	0.784693
TCGA-B0-5117	-483.51	-694.472	-1177.98	0.9081
TCGA-B0-5119	566.803	629.328	1196.13	0.710516
TCGA-B0-5120	1226.18	901.913	2128.09	0.607913
TCGA-B0-5121	727.19	1131.53	1858.72	0.638825
TCGA-B0-5399	788.249	1092.14	1880.39	0.636375
TCGA-B0-5400	751.351	1263.84	2015.19	0.620988
TCGA-B0-5402	799.543	702.019	1501.56	0.678264
TCGA-B0-5690	850.984	976.804	1827.79	0.642312
TCGA-B0-5691	1172.7	722.159	1894.86	0.634736
TCGA-B0-5692	81.0327	1861.65	1942.68	0.629295
TCGA-B0-5693	614.193	56.3355	670.528	0.762639
TCGA-B0-5694	696.084	787.082	1483.17	0.680246
TCGA-B0-5695	454.26	272.096	726.356	0.757313
TCGA-B0-5696	443.753	384.703	828.455	0.747441
TCGA-B0-5697	466.291	1635.1	2101.39	0.61102
TCGA-B0-5698	394.013	1539.12	1933.13	0.630384
TCGA-B0-5699	48.4963	806.349	854.846	0.744862
TCGA-B0-5700	337.717	612.607	950.324	0.735438
TCGA-B0-5701	151.665	942.873	1094.54	0.72093
TCGA-B0-5702	804.389	1277.09	2081.47	0.613332
TCGA-B0-5703	57.8652	673.71	731.575	0.756812
TCGA-B0-5705	376.105	856.904	1233.01	0.706696
TCGA-B0-5706	638.518	1740.3	2378.81	0.578286
TCGA-B0-5707	-365.431	94.3177	-271.113	0.844486
TCGA-B0-5709	1565.55	1970.51	3536.06	0.432042
TCGA-B0-5710	733.779	818.566	1552.34	0.672767
TCGA-B0-5711	732.284	935.734	1668.02	0.660109
TCGA-B0-5712	-175.245	99.8187	-75.4261	0.828756
TCGA-B0-5713	453.029	731.65	1184.68	0.711698
TCGA-B0-5812	1120.94	906.675	2027.61	0.619558
TCGA-B2-3923	422.173	-405.645	16.5276	0.821127
TCGA-B2-3924	689.415	1134.66	1824.08	0.642729
TCGA-B2-4098	49.3319	1042.58	1091.91	0.721197
TCGA-B2-4099	475.175	1509.59	1984.76	0.624483
TCGA-B2-4101	786.057	1504.41	2290.46	0.588818
TCGA-B2-4102	654.841	1392.84	2047.68	0.617243
TCGA-B2-5633	937.88	1195.51	2133.39	0.607295
TCGA-B2-5635	596.969	1326.83	1923.8	0.631447
TCGA-B2-5636	821.305	347.038	1168.34	0.71338
TCGA-B2-5639	323.733	1112.28	1436.02	0.685302
TCGA-B2-5641	684.989	1827.73	2512.72	0.56214
TCGA-B2-A4SR	575.258	848.561	1423.82	0.686605
TCGA-B4-5377	465.539	934.261	1399.8	0.689164
TCGA-B4-5378	364.968	-6.7342	358.234	0.791479
TCGA-B4-5832	1107.82	999.137	2106.95	0.610374
TCGA-B4-5834	797.472	521.531	1319	0.697709
TCGA-B4-5835	-288.049	567.631	279.582	0.798482
TCGA-B4-5836	942.237	946.326	1888.56	0.635449
TCGA-B4-5838	724.876	234.467	959.343	0.73454
TCGA-B4-5843	684.176	182.432	866.609	0.743709
TCGA-B4-5844	622.01	415.28	1037.29	0.726728
TCGA-B8-4143	624.997	1821.41	2446.41	0.570163
TCGA-B8-4146	506.459	1061.12	1567.58	0.671111
TCGA-B8-4148	489.738	1809.36	2299.09	0.587794
TCGA-B8-4151	82.764	306.878	389.642	0.788652
TCGA-B8-4153	267.834	516.689	784.523	0.751709
TCGA-B8-4154	556.853	1222.72	1779.58	0.64772
TCGA-B8-4619	-269.088	-396.083	-665.171	0.874036
TCGA-B8-4620	1088.92	1213.1	2302.02	0.587446
TCGA-B8-4621	-243.737	739.528	495.791	0.778977
TCGA-B8-4622	732.915	1338.34	2071.25	0.614517
TCGA-B8-5158	607.666	1320.53	1928.19	0.630947
TCGA-B8-5159	430.437	733.91	1164.35	0.713791
TCGA-B8-5162	1721.46	2567.68	4289.14	0.329915
TCGA-B8-5163	1737.6	1987.64	3725.24	0.406835
TCGA-B8-5164	595.416	2270.54	2865.96	0.518521
TCGA-B8-5165	1080.16	562.681	1642.84	0.662881
TCGA-B8-5545	1428.35	1145.9	2574.25	0.554648
TCGA-B8-5546	-759.144	-650.798	-1409.94	0.921829
TCGA-B8-5549	572.165	987.472	1559.64	0.671975
TCGA-B8-5550	1440.69	857.297	2297.98	0.587925
TCGA-B8-5551	920.546	2634.29	3554.83	0.429556
TCGA-B8-5552	1419.44	1292.86	2712.3	0.537673
TCGA-B8-5553	789.708	1312.5	2102.2	0.610926
TCGA-B8-A54D	240.916	1857.71	2098.63	0.611342
TCGA-B8-A54E	-734.631	-88.0375	-822.668	0.885034
TCGA-B8-A54F	870.6	938.892	1809.49	0.644368
TCGA-B8-A54G	159.937	2561.41	2721.34	0.536553
TCGA-B8-A54H	404.604	797.663	1202.27	0.709882
TCGA-B8-A54I	530.088	1724.09	2254.18	0.593115
TCGA-B8-A54J	625.723	975.51	1601.23	0.667441
TCGA-B8-A54K	-392.178	-619.876	-1012.05	0.897632
TCGA-B8-A7U6	710.542	779.252	1489.79	0.679532
TCGA-B8-A8YJ	1664.92	1538.72	3203.64	0.475517
TCGA-BP-4158	486.775	426.737	913.512	0.739089
TCGA-BP-4159	1061.55	1000.19	2061.74	0.615618
TCGA-BP-4160	993.65	1852.82	2846.47	0.520964
TCGA-BP-4161	558.71	1786.39	2345.1	0.582317
TCGA-BP-4162	573.162	1623.34	2196.5	0.59991
TCGA-BP-4163	756.775	1086.84	1843.61	0.64053
TCGA-BP-4164	-69.9664	275.8	205.834	0.804952
TCGA-BP-4165	536.806	1022.1	1558.9	0.672055
TCGA-BP-4166	1065.28	923.122	1988.41	0.624065
TCGA-BP-4167	1784.11	2331.06	4115.17	0.353911
TCGA-BP-4169	1491.39	1664.93	3156.32	0.481617
TCGA-BP-4170	983.225	1326.1	2309.32	0.586578
TCGA-BP-4173	1318.84	2810.39	4129.24	0.351979
TCGA-BP-4174	372.12	1116.11	1488.23	0.6797
TCGA-BP-4176	1094.67	1705.75	2800.42	0.526722
TCGA-BP-4177	327.026	-278.605	48.4204	0.818446
TCGA-BP-4325	326.022	1155.09	1481.11	0.680467
TCGA-BP-4326	757.843	618.663	1376.51	0.691638
TCGA-BP-4327	404.172	467.253	871.426	0.743236
TCGA-BP-4329	1068.21	1049.55	2117.76	0.609117
TCGA-BP-4330	871.413	1887.48	2758.9	0.531894
TCGA-BP-4331	662.615	1235.21	1897.82	0.634399
TCGA-BP-4332	614.852	469.023	1083.88	0.722014
TCGA-BP-4334	-867.187	-350.067	-1217.25	0.910498
TCGA-BP-4335	716.761	1220.93	1937.69	0.629865
TCGA-BP-4337	1019.91	503.226	1523.14	0.675933
TCGA-BP-4338	-72.2216	890.356	818.134	0.748446
TCGA-BP-4340	-132.042	135.296	3.25385	0.822238
TCGA-BP-4341	125.132	287.526	412.658	0.786571
TCGA-BP-4342	825.189	758.356	1583.55	0.669372
TCGA-BP-4343	1646.59	1709.62	3356.21	0.455698
TCGA-BP-4344	1231.15	904.512	2135.66	0.607031
TCGA-BP-4345	1802.17	1508.8	3310.97	0.461599
TCGA-BP-4346	702.712	2349.21	3051.92	0.494989
TCGA-BP-4347	589.597	571.428	1161.02	0.714133
TCGA-BP-4349	539.926	536.582	1076.51	0.722762
TCGA-BP-4351	465.143	520.673	985.816	0.731898
TCGA-BP-4352	-571.292	-246.914	-818.207	0.884729
TCGA-BP-4353	1208.17	1533.78	2741.94	0.533999
TCGA-BP-4354	1486.89	2401.99	3888.88	0.384777
TCGA-BP-4355	919.771	315.519	1235.29	0.706459
TCGA-BP-4756	-701.03	227.487	-473.543	0.860026
TCGA-BP-4758	620.662	1726.29	2346.95	0.582096
TCGA-BP-4759	573.236	688.958	1262.19	0.703659
TCGA-BP-4760	389.096	-8.47928	380.617	0.789466
TCGA-BP-4761	-304.997	818.406	513.409	0.777353
TCGA-BP-4762	1578.99	1242.34	2821.33	0.524111
TCGA-BP-4763	895.8	492.224	1388.02	0.690416
TCGA-BP-4765	715.095	491.952	1207.05	0.709387
TCGA-BP-4766	467.776	581.511	1049.29	0.725518
TCGA-BP-4768	-92.2875	151.733	59.4458	0.817515
TCGA-BP-4769	666.493	-301.865	364.628	0.790905
TCGA-BP-4770	1757.16	661.884	2419.04	0.573459
TCGA-BP-4771	1028.64	2675.76	3704.4	0.409628
TCGA-BP-4774	509.447	551.077	1060.52	0.724381
TCGA-BP-4775	346.081	746.403	1092.48	0.721139
TCGA-BP-4776	552.325	751.694	1304.02	0.699283
TCGA-BP-4777	893.481	2147.08	3040.56	0.496438
TCGA-BP-4781	775.247	736.358	1511.61	0.67718
TCGA-BP-4782	774.453	1245.9	2020.35	0.620394
TCGA-BP-4784	642.508	149.939	792.447	0.750942
TCGA-BP-4787	1468.12	1496.24	2964.35	0.506117
TCGA-BP-4789	952.306	232.609	1184.91	0.711673
TCGA-BP-4790	1319.83	1470.49	2790.32	0.527982
TCGA-BP-4795	1373.56	937.347	2310.9	0.58639
TCGA-BP-4797	946.673	1282.21	2228.88	0.596101
TCGA-BP-4798	1324.51	2608.45	3932.96	0.378797
TCGA-BP-4799	909.188	1355.71	2264.9	0.591847
TCGA-BP-4801	1434.56	1331.72	2766.28	0.530976
TCGA-BP-4803	794.284	661.347	1455.63	0.683203
TCGA-BP-4804	1344.39	1979.96	3324.35	0.459856
TCGA-BP-4807	1206.86	864.362	2071.22	0.61452
TCGA-BP-4959	713.622	1286.86	2000.48	0.622679
TCGA-BP-4960	926.885	1370.61	2297.49	0.587984
TCGA-BP-4961	863.006	461.433	1324.44	0.697137
TCGA-BP-4962	1390.89	1562.68	2953.57	0.507481
TCGA-BP-4963	719.378	1368.63	2088.01	0.612574
TCGA-BP-4964	617.253	908.376	1525.63	0.675664
TCGA-BP-4965	774.669	652.808	1427.48	0.686214
TCGA-BP-4967	249.636	424.979	674.615	0.762251
TCGA-BP-4968	593.555	1315.19	1908.74	0.633159
TCGA-BP-4969	31.48	-159.18	-127.7	0.833025
TCGA-BP-4970	1435	1532.91	2967.91	0.505666
TCGA-BP-4971	1326.27	1693.89	3020.16	0.499035
TCGA-BP-4972	1516.02	1250.21	2766.24	0.530981
TCGA-BP-4973	406.722	1079.5	1486.22	0.679916
TCGA-BP-4974	872.274	490.959	1363.23	0.693043
TCGA-BP-4975	939.619	489.45	1429.07	0.686044
TCGA-BP-4976	433.823	309.218	743.041	0.755711
TCGA-BP-4977	401.547	819.19	1220.74	0.70797
TCGA-BP-4981	130.506	910.538	1041.04	0.72635
TCGA-BP-4982	1192.81	1044.07	2236.88	0.595157
TCGA-BP-4983	490.327	2166.27	2656.59	0.54455
TCGA-BP-4985	644.54	798.886	1443.43	0.68451
TCGA-BP-4986	1208.74	1096.81	2305.56	0.587026
TCGA-BP-4987	651.842	790.653	1442.5	0.684609
TCGA-BP-4989	942.235	2469.53	3411.77	0.448424
TCGA-BP-4991	765.541	772.115	1537.66	0.674361
TCGA-BP-4992	-30.982	1985.72	1954.74	0.627919
TCGA-BP-4993	1012.4	865.005	1877.41	0.636713
TCGA-BP-4994	-143.565	86.9907	-56.5745	0.827204
TCGA-BP-4995	107.322	438.973	546.295	0.774307
TCGA-BP-4998	1312.28	1463.07	2775.35	0.529847
TCGA-BP-4999	905.493	456.149	1361.64	0.693212
TCGA-BP-5000	959.836	1300.45	2260.28	0.592393
TCGA-BP-5001	168.998	766.555	935.552	0.736905
TCGA-BP-5004	587.519	524.148	1111.67	0.719186
TCGA-BP-5006	533.886	743.534	1277.42	0.702069
TCGA-BP-5007	398.265	855.854	1254.12	0.704501
TCGA-BP-5008	1082.72	1294.67	2377.4	0.578456
TCGA-BP-5009	755.412	1369.72	2125.13	0.608258
TCGA-BP-5010	1286.59	762.726	2049.32	0.617054
TCGA-BP-5168	353.343	481.666	835.008	0.746802
TCGA-BP-5169	706.815	1827.55	2534.37	0.559509
TCGA-BP-5170	1178.59	937.12	2115.71	0.609355
TCGA-BP-5173	588.216	1145.8	1734.01	0.652801
TCGA-BP-5174	208.831	425	633.831	0.766112
TCGA-BP-5175	371.806	954.15	1325.96	0.696978
TCGA-BP-5176	536.21	603.253	1139.46	0.716345
TCGA-BP-5177	1135.35	430.146	1565.49	0.671338
TCGA-BP-5178	773.482	1545.99	2319.47	0.585371
TCGA-BP-5180	-104.697	1255.66	1150.96	0.715166
TCGA-BP-5181	650.087	631.194	1281.28	0.701665
TCGA-BP-5182	1625.08	1773.3	3398.38	0.450179
TCGA-BP-5183	43.5653	1334.23	1377.79	0.691501
TCGA-BP-5184	1016.86	911.841	1928.7	0.630889
TCGA-BP-5185	241.6	481.212	722.813	0.757652
TCGA-BP-5186	659.902	416.509	1076.41	0.722772
TCGA-BP-5187	820.763	638.489	1459.25	0.682814
TCGA-BP-5189	1078.13	1252.6	2330.73	0.58403
TCGA-BP-5190	10.13	469.881	480.011	0.780427
TCGA-BP-5191	277.649	2361.48	2639.13	0.546698
TCGA-BP-5192	91.4696	-83.495	7.97469	0.821843
TCGA-BP-5194	846.823	821.59	1668.41	0.660065
TCGA-BP-5195	1215.28	958.268	2173.54	0.602602
TCGA-BP-5196	881.345	1153.54	2034.88	0.61872
TCGA-BP-5198	1271.42	1267.63	2539.05	0.55894
TCGA-BP-5199	1243.62	1980.72	3224.34	0.472842
TCGA-BP-5200	1114.22	1221.48	2335.71	0.583437
TCGA-BP-5201	164.046	1446.05	1610.1	0.666471
TCGA-BP-5202	517.6	598.637	1116.24	0.718719
TCGA-CJ-4634	927.156	447.744	1374.9	0.691808
TCGA-CJ-4635	725.741	1412.06	2137.8	0.606781
TCGA-CJ-4636	1226.58	1766.77	2993.35	0.502441
TCGA-CJ-4637	959.358	2635.47	3594.83	0.424246
TCGA-CJ-4638	-335.413	33.0546	-302.359	0.846934
TCGA-CJ-4639	555.008	1212.59	1767.6	0.649058
TCGA-CJ-4640	817.176	1717.79	2534.97	0.559436
TCGA-CJ-4641	960.145	2116.2	3076.34	0.491871
TCGA-CJ-4642	760.268	176.196	936.464	0.736815
TCGA-CJ-4643	1078.31	1091.94	2170.26	0.602988
TCGA-CJ-4644	867.125	1294.44	2161.57	0.604004
TCGA-CJ-4868	1486.3	1770.74	3257.04	0.468607
TCGA-CJ-4869	654.941	2276.71	2931.65	0.510251
TCGA-CJ-4870	520.827	567.008	1087.83	0.721612
TCGA-CJ-4871	921.403	697.752	1619.15	0.66548
TCGA-CJ-4872	1375.3	1380.42	2755.73	0.532288
TCGA-CJ-4873	873.449	2074.46	2947.91	0.508197
TCGA-CJ-4874	732.294	1358.27	2090.56	0.612278
TCGA-CJ-4875	248.326	1279.97	1528.3	0.675375
TCGA-CJ-4876	-347.075	422.082	75.0077	0.816198
TCGA-CJ-4878	119.421	222.576	341.996	0.792933
TCGA-CJ-4881	1010.51	1416.83	2427.34	0.57246
TCGA-CJ-4882	1125.33	1884.17	3009.5	0.500391
TCGA-CJ-4884	604.068	1515.08	2119.15	0.608955
TCGA-CJ-4885	227.39	271.044	498.434	0.778734
TCGA-CJ-4886	1066.34	1187.96	2254.29	0.593101
TCGA-CJ-4887	683.245	1992.82	2676.06	0.54215
TCGA-CJ-4888	1114.52	2501.03	3615.55	0.42149
TCGA-CJ-4889	1669.51	1717.18	3386.68	0.451712
TCGA-CJ-4890	1955.39	2570.77	4526.16	0.296877
TCGA-CJ-4891	707.936	1544.45	2252.39	0.593326
TCGA-CJ-4892	607.126	1288.06	1895.19	0.634698
TCGA-CJ-4893	819.965	1397.58	2217.55	0.597435
TCGA-CJ-4894	638.307	1599.84	2238.15	0.595008
TCGA-CJ-4895	1353.95	1324.53	2678.48	0.541852
TCGA-CJ-4897	667.971	412.161	1080.13	0.722394
TCGA-CJ-4899	1224.36	830.319	2054.68	0.616434
TCGA-CJ-4900	761.452	2011.68	2773.14	0.530122
TCGA-CJ-4901	933.587	2419.37	3352.95	0.456124
TCGA-CJ-4902	1280.99	1399.21	2680.19	0.541641
TCGA-CJ-4903	774.371	1147.01	1921.38	0.631722
TCGA-CJ-4904	781.41	898.694	1680.1	0.658775
TCGA-CJ-4905	1214.85	590.241	1805.09	0.644862
TCGA-CJ-4907	1107.4	633.859	1741.26	0.651994
TCGA-CJ-4908	1095.39	862.957	1958.34	0.627507
TCGA-CJ-4912	95.2373	483.066	578.303	0.771325
TCGA-CJ-4916	735.164	2258.12	2993.28	0.50245
TCGA-CJ-4918	1602.59	1222.53	2825.12	0.523637
TCGA-CJ-4920	926.565	739.293	1665.86	0.660347
TCGA-CJ-5671	1728.97	1917.85	3646.82	0.417323
TCGA-CJ-5672	741.614	2004.37	2745.98	0.533498
TCGA-CJ-5675	253.844	2052.02	2305.86	0.58699
TCGA-CJ-5676	1127.52	1401.47	2528.99	0.560164
TCGA-CJ-5677	1344.57	1219.67	2564.24	0.555869
TCGA-CJ-5678	377.67	2009.2	2386.87	0.577321
TCGA-CJ-5679	298.104	-105.555	192.549	0.806108
TCGA-CJ-5680	371.457	390.697	762.154	0.753871
TCGA-CJ-5681	-357.895	-253.993	-611.889	0.870209
TCGA-CJ-5682	1088.46	602.268	1690.73	0.657601
TCGA-CJ-5683	437.722	405.027	842.748	0.746045
TCGA-CJ-5684	631.727	1027.09	1658.81	0.661123
TCGA-CJ-5686	738.23	1318.38	2056.61	0.616211
TCGA-CJ-5689	1373.48	1394.3	2767.78	0.530789
TCGA-CJ-6027	320.621	1986.09	2306.71	0.586888
TCGA-CJ-6028	890.609	1852.49	2743.1	0.533855
TCGA-CJ-6030	975.832	2084.74	3060.57	0.493886
TCGA-CJ-6031	1576.78	1769.79	3346.57	0.456957
TCGA-CJ-6032	270.639	577.604	848.243	0.745508
TCGA-CJ-6033	868.784	760.421	1629.2	0.664378
TCGA-CW-5580	779.917	760.548	1540.47	0.674056
TCGA-CW-5581	217.473	443.4	660.874	0.763555
TCGA-CW-5583	676.857	167.654	844.511	0.745873
TCGA-CW-5584	799.194	796.301	1595.49	0.668068
TCGA-CW-5585	160.789	-67.0318	93.7575	0.814604
TCGA-CW-5587	1014.07	1893.77	2907.84	0.513254
TCGA-CW-5588	1302.24	1197.08	2499.33	0.563765
TCGA-CW-5589	848.949	898.623	1747.57	0.651292
TCGA-CW-5590	922.479	967.984	1890.46	0.635234
TCGA-CW-5591	479.276	-301.242	178.034	0.807367
TCGA-CW-6087	789.593	2769.96	3559.55	0.428931
TCGA-CW-6088	715.513	321.623	1037.14	0.726744
TCGA-CW-6090	1220.15	1534.13	2754.28	0.532468
TCGA-CW-6093	647.37	469.53	1116.9	0.718652
TCGA-CW-6097	1297.8	1880.86	3178.66	0.47874
TCGA-CZ-4853	-32.2992	556.18	523.88	0.776385
TCGA-CZ-4854	429.22	642.829	1072.05	0.723214
TCGA-CZ-4856	798.299	1131.17	1929.47	0.630802
TCGA-CZ-4857	694.753	1096.05	1790.81	0.646463
TCGA-CZ-4858	415.251	1563.26	1978.51	0.625199
TCGA-CZ-4859	-94.479	48.2591	-46.2199	0.826349
TCGA-CZ-4860	454.512	768.369	1222.88	0.707747
TCGA-CZ-4861	560.622	1969.36	2529.98	0.560043
TCGA-CZ-4862	770.828	1998.45	2769.28	0.530603
TCGA-CZ-4863	694.894	1739.86	2434.75	0.571568
TCGA-CZ-4864	607.367	1890.16	2497.53	0.563983
TCGA-CZ-4865	1044.47	1218.66	2263.14	0.592055
TCGA-CZ-4866	100.866	718.599	819.465	0.748317
TCGA-CZ-5451	294.659	817.556	1112.22	0.719129
TCGA-CZ-5452	250.58	2221.17	2471.75	0.567104
TCGA-CZ-5453	169.589	-95.5369	74.052	0.816279
TCGA-CZ-5454	705.363	1690.89	2396.25	0.576196
TCGA-CZ-5455	785.272	1684.95	2470.22	0.567289
TCGA-CZ-5456	659.601	1284.72	1944.32	0.629108
TCGA-CZ-5457	666.305	903.285	1569.59	0.670892
TCGA-CZ-5458	620.423	1069.91	1690.34	0.657644
TCGA-CZ-5459	383.448	774.733	1158.18	0.714425
TCGA-CZ-5460	338.148	1316.59	1654.74	0.661572
TCGA-CZ-5461	972.191	1102.32	2074.51	0.61414
TCGA-CZ-5462	134.971	1225.02	1359.99	0.693386
TCGA-CZ-5463	220.998	729.795	950.792	0.735391
TCGA-CZ-5464	1028.18	1644.06	2672.24	0.542621
TCGA-CZ-5465	212.053	304.411	516.464	0.777071
TCGA-CZ-5466	752.19	1718.01	2470.2	0.567291
TCGA-CZ-5467	559.406	465.324	1024.73	0.727994
TCGA-CZ-5468	505.506	876.091	1381.6	0.691098
TCGA-CZ-5469	-18.2646	256.991	238.726	0.802078
TCGA-CZ-5470	517.033	1480.02	1997.05	0.623073
TCGA-CZ-5982	377.84	244.964	622.804	0.767152
TCGA-CZ-5984	359.707	1137.54	1497.25	0.678729
TCGA-CZ-5985	405.372	1499.13	1904.5	0.633641
TCGA-CZ-5986	375.381	541.451	916.832	0.73876
TCGA-CZ-5987	101.104	1138.36	1239.46	0.706026
TCGA-CZ-5988	800.761	701.61	1502.37	0.678176
TCGA-CZ-5989	916.286	1227.59	2143.87	0.606073
TCGA-DV-5565	793.647	703.07	1496.72	0.678786
TCGA-DV-5566	323.828	372.988	696.816	0.760137
TCGA-DV-5567	-77.9601	-408.047	-486.007	0.860958
TCGA-DV-5568	858.569	1116.9	1975.47	0.625547
TCGA-DV-5569	743.845	1031.35	1775.2	0.64821
TCGA-DV-5573	583.87	1816.35	2400.22	0.57572
TCGA-DV-5574	1592.27	1702.49	3294.76	0.463709
TCGA-DV-5575	859.857	983.076	1842.93	0.640607
TCGA-DV-5576	-54.7384	-650.827	-705.566	0.876902
TCGA-DV-A4VX	-532.104	433.037	-99.0668	0.830693
TCGA-DV-A4VZ	-411.403	-366.008	-777.411	0.881922
TCGA-DV-A4W0	190.186	221.018	411.204	0.786703
TCGA-EU-5904	861.827	739.582	1601.41	0.667422
TCGA-EU-5905	849.114	703.759	1552.87	0.67271
TCGA-EU-5906	896.913	850.409	1747.32	0.65132
TCGA-EU-5907	208.588	97.4271	306.015	0.79614
TCGA-G6-A5PC	-144.343	952.703	808.359	0.749397
TCGA-G6-A8L6	381.896	1268.35	1650.25	0.662066
TCGA-G6-A8L7	-215.354	404.174	188.821	0.806432
TCGA-G6-A8L8	-341.538	51.0162	-290.522	0.846009
TCGA-GK-A6C7	573.239	648.718	1221.96	0.707843
TCGA-MM-A563	1319.46	1867.82	3187.28	0.477628
TCGA-MM-A564	456.25	475.776	932.026	0.737255
TCGA-MM-A84U	886.985	902.882	1789.87	0.646568
TCGA-MW-A4EC	269.98	454.075	724.055	0.757533
TCGA-T7-A92I	-625.823	74.9418	-550.881	0.865763
