# Supplementary material for: Identification of transforming growth factor beta induced (TGFBI) as an immune-related prognostic factor in clear cell renal cell carcinoma (ccRCC)
Source: Aging (Albany NY). 2020 May 14;12(9):8484–505. doi: 10.18632/aging.103153 (PMC7244045; doi:10.18632/aging.103153)
Supplement: Supplementary Table 2 [file aging-12-103153-s004..xlsx]

## Sheet: diffSig1
Supplementary Table 2. Differentially expressed genes (DEGs) between low-immune samples and high-immune samples.
DEGs	logFC	AveExpr	t	P.Value	adj.P.Val	B
SNX20	1.47237	9.09405	25.7214	2.83677e-95	6.96796e-91	206.587
RHOH	1.39898	8.58989	25.464	5.41491e-94	6.65033e-90	203.655
SASH3	1.37757	10.392	24.8689	5.01368e-91	4.10503e-87	196.863
SLAMF7	1.90098	9.78264	24.4231	8.4296e-89	5.1764e-85	191.767
SP140	1.35108	8.04356	24.3561	1.82278e-88	8.95459e-85	191
CD53	1.31811	11.6977	23.3867	1.28706e-83	5.26899e-80	179.897
VAV1	1.27244	9.61828	23.3441	2.10375e-83	7.38207e-80	179.408
IL10RA	1.45528	11.3359	23.1693	1.57612e-82	4.83927e-79	177.405
CXCR6	1.51013	8.57312	23.1435	2.12238e-82	5.79243e-79	177.109
CRTAM	1.36839	7.52839	23.0581	5.68086e-82	1.39539e-78	176.13
P2RY10	1.36846	7.43951	23.043	6.76561e-82	1.51076e-78	175.956
PCED1B-AS1	1.29262	8.9926	22.9477	2.02918e-81	4.15355e-78	174.864
IL12RB1	1.23651	8.6484	22.8823	4.31251e-81	8.14832e-78	174.114
CCR5	1.77517	9.83325	22.8608	5.52264e-81	9.68948e-78	173.868
CD96	1.50472	9.26942	22.7272	2.57622e-80	4.21864e-77	172.336
TRAT1	1.33038	7.43101	22.6504	6.24292e-80	9.58405e-77	171.456
TIGIT	1.71203	8.39555	22.583	1.35752e-79	1.88564e-76	170.683
GPR65	1.23275	9.11936	22.5815	1.38182e-79	1.88564e-76	170.666
LAPTM5	1.31516	13.9746	22.4576	5.75865e-79	7.44472e-76	169.246
PTPN7	1.55465	9.28248	22.4086	1.0131e-78	1.18499e-75	168.684
CD3D	1.72757	8.95588	22.3977	1.14859e-78	1.2824e-75	168.56
SIT1	1.50656	7.93581	22.3659	1.65779e-78	1.77045e-75	168.195
IL2RG	1.65737	10.7046	22.3351	2.36426e-78	2.41972e-75	167.842
LCP1	1.47385	12.9237	22.2569	5.82188e-78	5.72011e-75	166.945
LCK	1.50625	9.58531	22.2475	6.48351e-78	6.12517e-75	166.838
CD27	1.96448	8.63706	22.197	1.16133e-77	1.05651e-74	166.258
GBP5	2.04366	10.3296	22.1597	1.78289e-77	1.56404e-74	165.832
SLAMF6	1.53976	8.90097	22.1285	2.55456e-77	2.16371e-74	165.474
EVI2B	1.32275	10.3808	22.0918	3.89795e-77	3.19151e-74	165.054
CD2	1.80142	10.0309	22.0828	4.32363e-77	3.42585e-74	164.951
NCKAP1L	1.4374	11.3419	22.0526	6.12764e-77	4.70354e-74	164.604
FERMT3	1.19283	10.6807	21.9946	1.1944e-76	8.89035e-74	163.94
CD48	1.40259	10.2202	21.9722	1.54628e-76	1.1171e-73	163.684
SLA2	1.35529	8.28816	21.9328	2.43525e-76	1.70906e-73	163.232
CD37	1.19245	10.5882	21.8928	3.85704e-76	2.63168e-73	162.774
UBASH3A	1.31152	7.64117	21.8608	5.58031e-76	3.70457e-73	162.407
BTK	1.09589	9.27929	21.8223	8.6933e-76	5.6193e-73	161.966
CD3G	1.5332	8.6022	21.7425	2.17664e-75	1.37089e-72	161.053
IKZF1	1.3562	10.3707	21.6972	3.66855e-75	2.25277e-72	160.534
SIRPG	1.67513	7.85582	21.5142	3.01356e-74	1.80541e-71	158.44
PTPN22	1.18776	8.41625	21.4989	3.5912e-74	2.10025e-71	158.265
SH2D1A	1.44152	8.08688	21.46	5.6199e-74	3.21027e-71	157.82
ICOS	1.24278	7.00276	21.427	8.21649e-74	4.58686e-71	157.442
ARHGAP30	1.25572	10.9315	21.3951	1.18571e-73	6.34466e-71	157.077
CD86	1.28786	9.86469	21.3949	1.18819e-73	6.34466e-71	157.075
SLAMF8	1.64633	9.83621	21.3178	2.88423e-73	1.50735e-70	156.193
HLA-DMB	1.19648	12.0662	21.308	3.22857e-73	1.65215e-70	156.081
AIF1	1.21216	10.9428	21.2976	3.63633e-73	1.82284e-70	155.962
C16orf54	1.14702	8.25099	21.2153	9.37147e-73	4.60383e-70	155.021
FCER1G	1.31052	11.2751	21.0933	3.80593e-72	1.83304e-69	153.627
CD3E	1.77203	10.3553	21.0182	9.01912e-72	4.26032e-69	152.769
THEMIS	1.43319	7.98529	21.0085	1.00818e-71	4.67245e-69	152.658
WAS	1.22868	9.94027	20.9449	2.09264e-71	9.34573e-69	151.932
TNFSF13B	1.47441	9.65069	20.9426	2.14896e-71	9.42587e-69	151.905
FYB	1.49007	11.1599	20.8902	3.91849e-71	1.68859e-68	151.308
CXCR3	1.59887	8.21875	20.7922	1.20765e-70	5.11442e-68	150.188
RAC2	1.43136	10.9889	20.7576	1.79438e-70	7.4704e-68	149.794
FCGR1A	1.42586	8.8229	20.6543	5.86993e-70	2.40305e-67	148.616
CTSS	1.34133	12.9761	20.6331	7.4821e-70	3.01283e-67	148.374
BIN2	1.04986	9.89982	20.5794	1.38552e-69	5.48912e-67	147.761
MILR1	1.00759	8.32375	20.567	1.59668e-69	6.22526e-67	147.62
TRAF3IP3	1.28131	9.01832	20.5643	1.64672e-69	6.32005e-67	147.59
PLEK	1.44522	10.8282	20.5479	1.9884e-69	7.47757e-67	147.402
ZNF831	1.22733	7.63155	20.5469	2.0092e-69	7.47757e-67	147.392
CORO1A	1.40981	11.7081	20.5386	2.21124e-69	8.10666e-67	147.296
C1QB	1.61964	13.5665	20.4517	5.98262e-69	2.16105e-66	146.306
SELPLG	1.12686	10.724	20.4423	6.66037e-69	2.371e-66	146.2
BATF	1.30292	7.75383	20.4256	8.07137e-69	2.83224e-66	146.009
CD200R1	1.38163	7.81958	20.2984	3.46019e-68	1.19708e-65	144.561
CD33	1.0117	8.58362	20.2874	3.92255e-68	1.33819e-65	144.436
PARVG	1.23043	10.0929	20.2796	4.28936e-68	1.44328e-65	144.347
LY9	1.14103	7.73138	20.2781	4.36578e-68	1.44914e-65	144.33
CD300LF	1.09329	8.35821	20.2445	6.40882e-68	2.09893e-65	143.948
ITGAL	1.43467	11.0301	20.2065	9.89886e-68	3.19929e-65	143.515
SH3BP1	1.01713	9.4657	20.1709	1.48786e-67	4.74626e-65	143.11
GZMK	2.09547	9.26753	20.1546	1.79239e-67	5.57298e-65	142.925
RASSF5	1.15503	10.6561	20.1429	2.04805e-67	6.28827e-65	142.792
HCK	1.09736	10.4064	20.1308	2.354e-67	7.13842e-65	142.654
NCF1	1.10647	8.02912	20.1266	2.46973e-67	7.39805e-65	142.606
LCP2	1.04824	11.4545	20.1125	2.90058e-67	8.58396e-65	142.446
PTPRC	1.43734	11.9608	20.1015	3.28782e-67	9.61413e-65	142.321
CD6	1.29997	9.20996	20.0915	3.68752e-67	1.06561e-64	142.207
ARHGAP9	1.26816	9.55357	20.0767	4.36689e-67	1.24725e-64	142.039
NOD2	1.23854	8.17156	19.9996	1.05332e-66	2.94009e-64	141.163
CYTH4	1.14518	10.4312	19.9953	1.10627e-66	3.05319e-64	141.115
CD5	1.3233	8.8132	19.988	1.20347e-66	3.28454e-64	141.031
HLA-DPB1	1.32384	14.564	19.9171	2.70231e-66	7.29416e-64	140.226
IRF4	1.45449	7.72988	19.8879	3.77067e-66	1.00673e-63	139.895
HLA-DRA	1.32473	16.0632	19.8815	4.05556e-66	1.07115e-63	139.823
HLA-DOB	1.4994	8.00554	19.8771	4.26828e-66	1.11534e-63	139.772
DEF6	1.19618	9.55691	19.8297	7.32427e-66	1.87402e-63	139.235
LAIR1	1.27004	11.0955	19.7806	1.28253e-65	3.24771e-63	138.677
TNFRSF9	2.00747	8.46754	19.7621	1.58356e-65	3.96909e-63	138.468
TNFAIP8L2	1.06124	8.73794	19.7397	2.04404e-65	5.07149e-63	138.214
C1QC	1.5292	13.3013	19.7152	2.70449e-65	6.64303e-63	137.935
ITK	1.31802	8.93526	19.7085	2.92008e-65	7.10157e-63	137.859
GPR174	1.16965	6.85258	19.6945	3.423e-65	8.24304e-63	137.701
CD8B	1.79872	8.28995	19.6865	3.75045e-65	8.94392e-63	137.61
LILRB4	1.46696	10.136	19.6631	4.89581e-65	1.1563e-62	137.345
CD8A	2.09291	10.3626	19.6573	5.23316e-65	1.22421e-62	137.279
IL16	1.03817	10.4217	19.6564	5.28408e-65	1.22446e-62	137.269
GZMA	1.62075	9.6856	19.6264	7.44166e-65	1.6925e-62	136.929
ITGB2	1.3334	12.9139	19.5854	1.18598e-64	2.6551e-62	136.465
MAP4K1	1.29672	9.06598	19.5852	1.18903e-64	2.6551e-62	136.463
SLAMF1	1.11	7.60475	19.582	1.23263e-64	2.72767e-62	136.427
AOAH	1.28908	10.1529	19.5783	1.28671e-64	2.82191e-62	136.384
CD38	1.48444	8.67995	19.5542	1.69296e-64	3.68001e-62	136.111
CST7	1.60735	9.50746	19.5496	1.78252e-64	3.84071e-62	136.06
C1QA	1.50318	13.3511	19.4987	3.18159e-64	6.7956e-62	135.484
PRKCB	1.25563	9.45085	19.4636	4.74784e-64	1.00535e-61	135.085
DOCK2	1.39037	10.8086	19.4262	7.25834e-64	1.52382e-61	134.663
MYO1F	1.15387	10.9595	19.403	9.45709e-64	1.9686e-61	134.4
LAT2	1.0056	9.88787	19.3885	1.11423e-63	2.2999e-61	134.237
CD4	1.13797	12.3572	19.3396	1.94428e-63	3.97977e-61	133.683
MS4A6A	1.2736	11.9887	19.3354	2.03923e-63	4.13964e-61	133.636
SAMSN1	1.21287	9.231	19.3058	2.85395e-63	5.69931e-61	133.302
EOMES	1.6131	8.34831	19.2878	3.49977e-63	6.93264e-61	133.099
SPI1	1.181	10.7525	19.2444	5.73417e-63	1.12679e-60	132.608
GFI1	1.11927	7.56116	19.2359	6.31145e-63	1.23038e-60	132.512
SCIMP	1.12213	8.76802	19.2111	8.36562e-63	1.60535e-60	132.232
DAPP1	1.09218	8.15075	19.2028	9.19327e-63	1.7505e-60	132.138
TAGAP	1.1191	9.3514	19.1952	1.0023e-62	1.89381e-60	132.052
IKZF3	1.56748	9.69363	19.1893	1.07176e-62	2.0096e-60	131.986
SLA	1.22768	10.926	19.1849	1.12665e-62	2.09651e-60	131.936
DOK2	1.07789	9.20533	19.1754	1.25388e-62	2.31572e-60	131.83
CCL5	1.76833	11.5358	19.1504	1.66596e-62	3.0538e-60	131.547
PSTPIP1	1.33554	8.68357	19.1085	2.68059e-62	4.87729e-60	131.074
CD72	1.26789	8.67636	19.1041	2.81643e-62	5.08676e-60	131.025
HLA-DQA1	1.55925	13.5831	19.0852	3.48941e-62	6.25623e-60	130.812
FASLG	1.28078	7.45208	19.0525	5.05488e-62	8.99733e-60	130.443
EMB	1.17195	10.2789	19.0119	8.00706e-62	1.41495e-59	129.986
FCGR3A	1.51694	12.7019	19.0076	8.41114e-62	1.47573e-59	129.937
EVI2A	1.15826	9.62483	19.0042	8.73995e-62	1.52255e-59	129.898
FAM26F	1.53979	9.29905	18.9174	2.33547e-61	4.03987e-59	128.921
CD247	1.19667	9.29745	18.863	4.32423e-61	7.27507e-59	128.308
PDCD1	1.69556	7.82116	18.7562	1.4452e-60	2.38244e-58	127.108
PYHIN1	1.25566	8.01855	18.6701	3.82353e-60	6.26116e-58	126.141
TYROBP	1.26586	12.0419	18.6266	6.25131e-60	1.0102e-57	125.652
LAG3	1.90009	8.60374	18.5015	2.56079e-59	4.08446e-57	124.249
SELL	1.13062	9.41377	18.4665	3.80178e-59	6.02472e-57	123.856
C1orf162	1.1745	10.6835	18.3853	9.48094e-59	1.46466e-56	122.948
SPN	1.27551	10.0534	18.3109	2.1888e-58	3.32997e-56	122.116
CD52	1.29909	10.2085	18.3106	2.19621e-58	3.32997e-56	122.112
IGSF6	1.17714	10.0882	18.3079	2.26442e-58	3.41233e-56	122.082
SIGLEC10	1.25045	9.6866	18.3034	2.38316e-58	3.56937e-56	122.031
ZBED2	1.35709	6.58071	18.2807	3.07403e-58	4.54863e-56	121.778
LOC100506585	1.00049	7.58328	18.2788	3.14046e-58	4.61911e-56	121.757
CCR2	1.3353	8.90925	18.2377	4.98476e-58	7.28813e-56	121.297
LILRB2	1.01326	9.71376	18.1868	8.82796e-58	1.2764e-55	120.729
LPAR5	1.05574	8.78221	18.1868	8.83391e-58	1.2764e-55	120.728
TMC8	1.23406	9.96324	18.1589	1.20802e-57	1.73524e-55	120.417
MYO1G	1.2481	9.82206	18.1042	2.23071e-57	3.18564e-55	119.807
HLA-DPA1	1.32198	14.9348	18.0713	3.22536e-57	4.55155e-55	119.44
NELL2	1.36401	7.82479	18.0709	3.24277e-57	4.55155e-55	119.435
ST8SIA1	1.12244	7.56866	18.0559	3.83462e-57	5.35169e-55	119.268
CD28	1.17489	8.1983	17.9979	7.34292e-57	1.00202e-54	118.622
HLA-DMA	1.02113	12.8517	17.9522	1.22547e-56	1.65995e-54	118.113
TRPM2	1.15779	9.65443	17.9519	1.22995e-56	1.65995e-54	118.109
FMNL1	1.07168	10.8809	17.9407	1.3933e-56	1.87015e-54	117.985
CD74	1.18902	17.7042	17.937	1.45192e-56	1.93824e-54	117.944
AIM2	1.2778	7.20934	17.892	2.40248e-56	3.17269e-54	117.443
BCL11B	1.18122	8.69832	17.851	3.80078e-56	4.99243e-54	116.987
LY86	1.1055	9.46031	17.8302	4.79625e-56	6.2665e-54	116.756
JAKMIP1	1.15631	7.08593	17.8109	5.94658e-56	7.72835e-54	116.542
LST1	1.08277	9.98088	17.7731	9.07405e-56	1.16694e-53	116.122
TNFSF8	1.00093	8.20899	17.7572	1.08333e-55	1.37875e-53	115.946
SLC15A3	1.02711	11.2091	17.675	2.71212e-55	3.4339e-53	115.033
MIR7847	1.2281	11.3532	17.6431	3.87095e-55	4.85114e-53	114.679
JAML	1.07334	9.96551	17.599	6.32772e-55	7.88974e-53	114.191
RGS10	1.01433	10.2468	17.5902	6.97533e-55	8.65328e-53	114.094
GAS7	1.15428	9.87316	17.5767	8.11484e-55	1.00163e-52	113.943
CD84	1.47489	10.5353	17.5496	1.09624e-54	1.34635e-52	113.644
IL2RB	1.26455	10.4302	17.4924	2.07177e-54	2.53178e-52	113.011
TBC1D10C	1.26599	9.15264	17.4735	2.55847e-54	3.11108e-52	112.802
IFNG	1.10447	6.27091	17.3995	5.81923e-54	7.00676e-52	111.984
ADA2	1.22383	12.2487	17.3875	6.64925e-54	7.9671e-52	111.852
TLR10	1.02751	7.2032	17.3768	7.48946e-54	8.93027e-52	111.734
NCF4	1.03566	9.3684	17.3365	1.17078e-53	1.38259e-51	111.289
NCF2	1.03967	10.0193	17.2317	3.74378e-53	4.37898e-51	110.134
HCST	1.14405	8.3844	17.2144	4.53449e-53	5.2787e-51	109.943
PTAFR	1.21938	10.2145	17.1976	5.4577e-53	6.32346e-51	109.759
TOX	1.45058	8.48896	17.153	8.95057e-53	1.02735e-50	109.267
DUSP2	1.383	8.80321	17.0985	1.63354e-52	1.86626e-50	108.669
XCR1	1.33223	7.30719	17.0979	1.64509e-52	1.87076e-50	108.662
TESPA1	1.08036	8.18565	17.0794	2.01786e-52	2.27361e-50	108.459
CCL4	1.3773	9.61798	17.0554	2.63187e-52	2.9519e-50	108.195
CD69	1.11133	8.91777	17.0335	3.35318e-52	3.74383e-50	107.954
HLA-DRB1	1.15852	15.2735	16.987	5.60073e-52	6.19688e-50	107.444
SH2D2A	1.29829	8.34554	16.974	6.45988e-52	7.11543e-50	107.302
TLR2	1.05266	10.5669	16.9496	8.455e-52	9.27144e-50	107.034
HLA-DOA	1.4448	11.8873	16.9434	9.05333e-52	9.88342e-50	106.966
ZBP1	1.1051	7.38732	16.9208	1.16145e-51	1.26233e-49	106.719
TLR8	1.3123	8.53245	16.9163	1.22041e-51	1.32057e-49	106.669
CTLA4	1.12239	6.9908	16.7487	7.72262e-51	8.17632e-49	104.835
CD180	1.14709	8.69422	16.7383	8.65303e-51	9.12208e-49	104.722
RNASE6	1.04235	10.1031	16.7292	9.56605e-51	9.99876e-49	104.622
CSF2RA	1.02753	9.49371	16.7073	1.21594e-50	1.26556e-48	104.384
IL21R	1.14429	8.34115	16.6697	1.83768e-50	1.89659e-48	103.973
LAX1	1.09049	7.4263	16.6418	2.49697e-50	2.56624e-48	103.668
DNAJC5B	1.02704	6.84336	16.6268	2.94278e-50	3.01182e-48	103.505
MNDA	1.10241	9.77891	16.6082	3.60798e-50	3.67729e-48	103.302
CYTIP	1.06202	9.68664	16.5903	4.38744e-50	4.45325e-48	103.108
PIK3R5	1.0088	9.94109	16.5764	5.11286e-50	5.16819e-48	102.956
ASB2	1.1447	7.88285	16.5722	5.34852e-50	5.36227e-48	102.911
STAT1	1.06414	13.7622	16.4592	1.84279e-49	1.82518e-47	101.681
UCP2	1.10842	12.0886	16.4234	2.72523e-49	2.67759e-47	101.292
CCR4	1.10389	7.56858	16.3973	3.6213e-49	3.54382e-47	101.01
NKG7	1.53119	10.2742	16.2447	1.91128e-48	1.84105e-46	99.356
BCL2A1	1.18264	7.9351	16.1849	3.66282e-48	3.51444e-46	98.7094
CXCL9	1.86431	11.394	16.0676	1.30901e-47	1.23192e-45	97.4434
RUNX3	1.1662	10.3189	15.952	4.57644e-47	4.25799e-45	96.1993
SIGLEC8	1.33559	8.69374	15.8658	1.16188e-46	1.05701e-44	95.2733
LTB	1.32538	8.8015	15.8573	1.27258e-46	1.15344e-44	95.1828
KLHL6	1.05282	9.50368	15.8198	1.90859e-46	1.71097e-44	94.7799
CLEC7A	1.12874	9.61515	15.7483	4.12211e-46	3.68187e-44	94.0146
CTSW	1.38191	9.41613	15.744	4.31827e-46	3.8431e-44	93.9684
PLXNC1	1.0488	10.6857	15.6429	1.28031e-45	1.11916e-43	92.8882
SECTM1	1.16399	9.95397	15.63	1.47145e-45	1.28168e-43	92.7499
LIMD2	1.09774	10.1853	15.5908	2.2395e-45	1.93014e-43	92.3325
CXCL13	1.92419	7.67797	15.5828	2.44204e-45	2.09734e-43	92.2465
CSF3R	1.11257	9.95042	15.5656	2.93634e-45	2.51308e-43	92.0633
FOXP3	1.13935	7.51797	15.5269	4.44368e-45	3.7638e-43	91.6515
CIITA	1.10102	11.1105	15.483	7.11165e-45	6.00287e-43	91.1842
FCGR2B	1.22884	9.03054	15.4255	1.31622e-44	1.10342e-42	90.5724
TMIGD3	1.09199	9.74296	15.325	3.84745e-44	3.17131e-42	89.5064
C3AR1	1.07701	10.3603	15.3082	4.5993e-44	3.76575e-42	89.329
CARMIL2	1.1184	7.73496	15.3019	4.91938e-44	4.00115e-42	89.2622
CSF1R	1.09929	12.4495	15.3004	4.99975e-44	4.0531e-42	89.2461
CYBB	1.41934	11.8744	15.2792	6.26506e-44	5.04553e-42	89.0219
MS4A7	1.08593	11.6011	15.2157	1.23088e-43	9.78446e-42	88.3508
SLC37A2	1.0836	9.98004	15.1961	1.51706e-43	1.19818e-41	88.1431
PLCB2	1.08435	10.3063	15.1928	1.57016e-43	1.23615e-41	88.1089
TREM2	1.2789	10.2054	15.1906	1.60825e-43	1.26209e-41	88.0851
APOBEC3G	1.05027	10.5695	15.1517	2.42944e-43	1.88247e-41	87.6752
SIGLEC1	1.261	10.1689	15.1469	2.55752e-43	1.97549e-41	87.6241
PLA2G2D	1.50755	6.91373	15.0993	4.23911e-43	3.26411e-41	87.122
CCR1	1.19646	9.70491	15.093	4.52716e-43	3.46419e-41	87.0567
GAL3ST4	1.03377	9.85867	15.0175	1.00743e-42	7.63748e-41	86.2619
FGD2	1.0286	9.60842	14.9936	1.29778e-42	9.80839e-41	86.0102
CLEC12A	1.05691	7.97484	14.9615	1.82071e-42	1.36765e-40	85.6738
MSR1	1.24496	11.4798	14.9302	2.53487e-42	1.87542e-40	85.345
TLR7	1.26072	9.36204	14.6985	2.89901e-41	2.06401e-39	82.924
CEBPA	1.12762	9.1126	14.6614	4.27714e-41	3.0103e-39	82.5376
CXCL10	1.61551	10.4102	14.4138	5.67546e-40	3.86167e-38	79.9692
MS4A4A	1.08525	10.2282	14.3824	7.86239e-40	5.33491e-38	79.6454
CD14	1.11386	12.4393	14.3172	1.54811e-39	1.04468e-37	78.9724
NAPSB	1.28456	9.53432	14.172	6.95598e-39	4.60538e-37	77.48
FPR3	1.18583	10.7873	14.0852	1.70189e-38	1.11774e-36	76.5913
LYZ	1.59	12.8246	14.0213	3.28469e-38	2.15152e-36	75.9383
FCRL3	1.18275	7.4706	13.9705	5.53353e-38	3.59577e-36	75.4203
BASP1	1.25678	9.8108	13.9453	7.1601e-38	4.60402e-36	75.1644
MPEG1	1.05414	11.6371	13.8759	1.45722e-37	9.24902e-36	74.4587
CD7	1.18421	8.71535	13.7971	3.25955e-37	2.04246e-35	73.6593
CXCL11	1.405	8.49773	13.7897	3.51554e-37	2.19726e-35	73.5842
IRF8	1.05313	10.432	13.6747	1.1339e-36	7.0156e-35	72.4214
VSIG4	1.27206	10.6693	13.6034	2.33613e-36	1.43098e-34	71.7037
ANKRD22	1.32526	7.76486	13.596	2.51893e-36	1.53912e-34	71.6289
SLC1A3	1.18719	10.0732	13.5782	3.01682e-36	1.83877e-34	71.4498
ADAMDEC1	1.50032	7.82538	13.5083	6.1196e-36	3.6752e-34	70.7475
ZAP70	1.06674	8.84148	13.4649	9.47892e-36	5.65123e-34	70.3131
PRF1	1.04575	10.3265	13.4224	1.45416e-35	8.62765e-34	69.8882
HAMP	1.05104	6.75547	13.0213	8.02018e-34	4.41703e-32	65.9076
POU2AF1	1.40024	7.46614	12.9803	1.20418e-33	6.54385e-32	65.5043
CARD11	1.20509	9.61818	12.875	3.40782e-33	1.8197e-31	64.4719
GBP1	1.09462	12.1886	12.848	4.44761e-33	2.36465e-31	64.2076
ITGAX	1.03413	10.727	12.8166	6.05814e-33	3.18643e-31	63.9009
JCHAIN	2.07581	11.314	12.8014	7.03335e-33	3.67575e-31	63.7528
RGS1	1.25389	12.4	12.7864	8.15279e-33	4.25174e-31	63.6062
CD79A	1.39384	7.61615	12.7546	1.11488e-32	5.76523e-31	63.2957
GZMH	1.00412	8.58814	12.7416	1.26578e-32	6.51813e-31	63.1697
IGLL5	2.08499	9.01913	12.7319	1.39255e-32	7.15588e-31	63.075
MZB1	1.64826	7.84156	12.73	1.41811e-32	7.27202e-31	63.057
JAK3	1.02915	10.6221	12.4602	1.97049e-31	9.41658e-30	60.446
VNN2	1.03564	8.77075	12.4408	2.37761e-31	1.134e-29	60.2597
IL7R	1.19565	10.3509	12.4102	3.19691e-31	1.51594e-29	59.966
FCRL5	1.27307	6.8283	12.2993	9.32389e-31	4.35404e-29	58.9042
SDS	1.24692	9.27561	12.1778	2.99428e-30	1.37217e-28	57.747
ALOX5	1.16014	10.9526	12.1769	3.01925e-30	1.38104e-28	57.7387
HLA-DPB2	1.06196	7.38687	11.8956	4.38814e-29	1.93165e-27	55.0846
PIK3AP1	1.00311	11.5642	11.8937	4.46773e-29	1.95966e-27	55.0668
MIR155	1.02616	7.72761	11.8672	5.73866e-29	2.50371e-27	54.8185
C2	1.53165	10.7017	11.8221	8.78101e-29	3.81074e-27	54.3968
HLA-DQB1	1.09678	13.8935	11.7928	1.15742e-28	4.97021e-27	54.123
CD163	1.27336	11.8815	11.7002	2.7608e-28	1.16719e-26	53.2612
HLA-DRB6	1.21489	11.0794	11.6792	3.35857e-28	1.41503e-26	53.0669
HLA-DRB5	1.08511	13.4565	11.6752	3.48547e-28	1.46599e-26	53.0301
FPR1	1.04938	9.31114	11.6657	3.81004e-28	1.59703e-26	52.9418
APOC1	1.44103	11.8208	11.5612	1.00974e-27	4.18958e-26	51.9757
CCL3	1.06326	8.60159	11.5328	1.31478e-27	5.4186e-26	51.7141
IL2RA	1.03126	7.85449	11.5156	1.54167e-27	6.34304e-26	51.5563
NPL	1.01288	10.679	11.4524	2.76899e-27	1.13547e-25	50.9759
C1S	1.4898	13.7008	11.0808	8.32476e-26	3.25607e-24	47.6038
HLA-DQB2	1.36002	10.3198	10.9111	3.85067e-25	1.47098e-23	46.0868
DERL3	1.02002	8.76636	10.7695	1.36662e-24	5.14061e-23	44.8324
C1R	1.34794	13.5029	10.4831	1.71458e-23	6.13924e-22	42.3284
OLR1	1.03385	9.95563	10.3839	4.07782e-23	1.44536e-21	41.4709
MIAT	1.19163	8.1482	10.3207	7.06232e-23	2.48171e-21	40.9275
APOL1	1.14104	13.6046	10.1994	2.01381e-22	6.91821e-21	39.8907
UBD	1.28511	9.90628	9.88165	3.01481e-21	9.75664e-20	37.2143
CCL19	1.31928	7.23627	9.83533	4.45135e-21	1.42739e-19	36.8291
APOE	1.14694	14.3346	9.75241	8.91554e-21	2.83669e-19	36.1424
CYSLTR2	1.5038	8.73973	9.62028	2.67437e-20	8.33638e-19	35.0567
CCL4L2	1.01116	8.47969	9.18255	9.45375e-19	2.73191e-17	31.535
SERPINF1	1.06706	10.9664	9.12922	1.44813e-18	4.12172e-17	31.1139
CHI3L2	1.00799	8.00702	9.01788	3.50753e-18	9.74608e-17	30.2408
STUM	-1.22471	8.45163	-8.87831	1.0517e-17	2.83818e-16	29.1573
MARCO	1.0221	7.57072	8.78722	2.13917e-17	5.71136e-16	28.4569
C3	1.18256	16.0718	8.75447	2.75767e-17	7.33875e-16	28.2064
HLA-G	1.23455	10.2845	8.70552	4.02555e-17	1.06551e-15	27.8333
RARRES1	1.14218	8.76945	8.4635	2.55455e-16	6.45549e-15	26.0118
HLA-DQA2	1.43576	10.6579	8.32199	7.39341e-16	1.81475e-14	24.9648
CCL18	1.39601	8.42548	8.29047	9.35069e-16	2.27632e-14	24.7335
CDCP1	1.12413	10.2772	7.64009	1.02402e-13	2.19486e-12	20.1135
TGFBI	1.42444	14.9036	7.61896	1.18688e-13	2.53288e-12	19.9685
SAA1	1.82801	7.99234	7.44507	3.95282e-13	8.13174e-12	18.7869
SLC38A5	1.11828	8.12973	7.36043	7.0446e-13	1.42534e-11	18.2197
CD70	1.287	10.6701	7.35221	7.44924e-13	1.49994e-11	18.1649
CHIT1	1.26951	8.12688	7.16364	2.64585e-12	5.09726e-11	16.9215
AQP9	1.00986	8.39494	6.81783	2.52687e-11	4.43973e-10	14.7109
IL20RB	1.2947	8.51023	6.70338	5.22884e-11	8.82722e-10	13.9994
SAA2	1.24925	6.874	6.68722	5.78943e-11	9.7135e-10	13.8998
OPCML	-1.02197	7.9243	-6.6658	6.62443e-11	1.10541e-09	13.768
C10orf99	1.31601	7.6057	6.62724	8.43546e-11	1.38874e-09	13.5317
C1QL1	1.23702	9.47181	6.59783	1.01352e-10	1.65086e-09	13.3523
CDHR1	1.1789	9.20289	6.5297	1.5467e-10	2.46059e-09	12.9392
VNN1	1.15928	9.55035	6.41402	3.14465e-10	4.80659e-09	12.2461
CCL21	1.13071	7.70987	6.30108	6.2249e-10	9.1176e-09	11.5797
S100A1	1.0646	10.8214	5.80129	1.13329e-08	1.38768e-07	8.75426
SLC34A2	1.3029	9.65007	5.37219	1.16706e-07	1.21468e-06	6.49292
MMP7	1.03667	11.0047	5.14541	3.76667e-07	3.58608e-06	5.36067
PAH	-1.05144	8.70714	-5.0573	5.87044e-07	5.37041e-06	4.9327
PRIMA1	1.03357	9.58952	4.7652	2.44042e-06	1.97775e-05	3.56199
CP	1.03645	13.287	4.69567	3.38975e-06	2.67467e-05	3.24673
LBP	1.10669	7.65344	4.68286	3.59967e-06	2.82307e-05	3.18912
FGG	1.27239	8.075	4.5065	8.11734e-06	5.89725e-05	2.41065
FGA	1.11274	8.26036	4.32468	1.82588e-05	0.000122071	1.63705
FGB	1.21399	8.91661	3.95537	8.68166e-05	0.000489437	0.15753
