# Supplementary material for: Identification of transforming growth factor beta induced (TGFBI) as an immune-related prognostic factor in clear cell renal cell carcinoma (ccRCC)
Source: Aging (Albany NY). 2020 May 14;12(9):8484–505. doi: 10.18632/aging.103153 (PMC7244045; doi:10.18632/aging.103153)
Supplement: Supplementary Table 3 [file aging-12-103153-s002..xlsx]

## Sheet: diffSig2
Supplementary Table 3. Differentially expressed genes (DEGs) between low-stromal samples and high-stromal samples.
DEGs	logFC	AveExpr	t	P.Value	adj.P.Val	B
MIR3606	1.88302	14.7722	19.4096	8.77157e-64	2.15456e-59	134.263
FAP	1.50577	8.35163	18.6895	3.0727e-60	3.77373e-56	126.189
COL1A2	1.86331	14.9934	18.5904	9.4035e-60	7.69927e-56	125.083
SULF1	1.56059	12.3531	18.0369	4.7434e-57	2.9128e-53	118.926
LTBP2	1.67743	11.589	17.9315	1.54409e-56	7.58551e-53	117.758
TMEM119	1.76088	9.13004	17.8807	2.72631e-56	1.11611e-52	117.196
INHBA	1.65351	10.0613	17.7141	1.75305e-55	6.15144e-52	115.354
PODN	2.00901	8.98784	17.6876	2.35773e-55	7.23911e-52	115.061
ADAM23	1.1923	7.14999	17.5583	9.94994e-55	2.71556e-51	113.637
FNDC1	1.82022	8.50459	17.4309	4.10669e-54	1.00873e-50	112.234
SMOC2	1.86574	10.4206	17.1724	7.21462e-53	1.61103e-49	109.398
COL14A1	1.8458	11.0463	17.118	1.31799e-52	2.69782e-49	108.802
ASPN	1.5912	9.28741	17.0999	1.61008e-52	3.04219e-49	108.604
CCDC80	1.88232	11.2282	16.9915	5.33033e-52	9.35207e-49	107.42
COL1A1	2.14032	14.9257	16.8032	4.23922e-51	6.94186e-48	105.368
MICAL2	1.208	11.3442	16.7552	7.18497e-51	1.10303e-47	104.846
PRRX1	1.64395	9.21254	16.7474	7.82899e-51	1.1312e-47	104.761
OLFML2B	1.36064	11.6163	16.7145	1.12374e-50	1.53346e-47	104.404
FBN1	1.26547	12.2447	16.6982	1.34366e-50	1.73707e-47	104.227
ITGA11	1.60875	9.77359	16.6697	1.83846e-50	2.25791e-47	103.917
COL5A1	1.78909	12.1473	16.5811	4.85665e-50	5.68066e-47	102.956
POSTN	1.91307	12.0448	16.3141	8.97452e-49	1.00201e-45	100.07
THBS2	2.12185	12.0253	16.0349	1.86456e-47	1.9083e-44	97.0687
COL5A2	1.33343	12.3399	16.0066	2.53511e-47	2.4908e-44	96.7647
PRELP	2.10418	10.4359	15.9998	2.72819e-47	2.57741e-44	96.6921
HEPH	1.14251	10.2565	15.9514	4.6044e-47	4.18881e-44	96.1743
COL6A3	1.73866	12.895	15.9129	6.98336e-47	6.12616e-44	95.7623
ANTXR1	1.18619	12.3598	15.7982	2.40697e-46	2.0387e-43	94.5381
ITGBL1	1.64966	8.17583	15.7603	3.62084e-46	2.96463e-43	94.1341
SYNPO2	1.51874	11.6368	15.6435	1.27182e-45	9.76242e-43	92.8913
PALLD	1.06746	12.4591	15.4362	1.17273e-44	8.72901e-42	90.6937
LUM	2.60211	10.7173	15.3587	2.68513e-44	1.88443e-41	89.8742
HTR2B	1.15988	7.2076	15.1598	2.23017e-43	1.52166e-40	87.7802
COL12A1	1.32423	11.8348	15.0927	4.54571e-43	3.01774e-40	87.0758
F13A1	1.76324	11.2832	15.058	6.56595e-43	4.24419e-40	86.7121
GUCY1A2	1.16135	10.521	14.9978	1.24144e-42	7.81883e-40	86.082
RGS4	1.24964	8.37481	14.9825	1.45847e-42	8.95609e-40	85.9227
MSRB3	1.01354	11.1745	14.889	3.91302e-42	2.34428e-39	84.9465
EMILIN1	1.50627	10.5727	14.8728	4.64362e-42	2.71574e-39	84.7772
ISLR	2.04042	9.39329	14.8702	4.77275e-42	2.72635e-39	84.7501
PCDH7	1.42576	7.99969	14.8523	5.76131e-42	3.21625e-39	84.5639
FBLIM1	1.16947	11.2481	14.7318	2.04431e-41	1.08651e-38	83.3112
ADAMTS12	1.32485	8.61048	14.6769	3.63915e-41	1.82426e-38	82.7408
AOC3	1.24033	11.117	14.6699	3.91283e-41	1.92222e-38	82.6691
VGLL3	1.48154	8.30958	14.6397	5.36949e-41	2.58609e-38	82.3561
LINC00924	1.24362	8.18319	14.6302	5.93368e-41	2.80286e-38	82.2573
TAGLN	1.38055	13.3857	14.5482	1.39783e-40	6.47826e-38	81.4098
ADAM19	1.03204	9.86696	14.5081	2.12398e-40	9.48571e-38	80.9961
FN1	1.37588	16.2586	14.4095	5.93362e-40	2.55698e-37	79.98
COL15A1	1.32765	12.6102	14.2728	2.45075e-39	1.03789e-36	78.5774
PTGIS	1.76068	9.30536	14.2568	2.89402e-39	1.20484e-36	78.413
ADAMTS2	1.17861	10.5368	14.2122	4.59156e-39	1.87971e-36	77.9565
CPED1	1.04607	9.91013	14.1882	5.87949e-39	2.32932e-36	77.712
COL4A1	1.0833	16.0181	14.1047	1.39173e-38	5.34142e-36	76.8599
PDE3A	1.09552	10.6456	14.0613	2.17584e-38	7.9769e-36	76.4181
PDGFRA	1.85428	8.61623	14.0488	2.47602e-38	8.81429e-36	76.2903
DDR2	1.11185	10.7926	13.9787	5.08546e-38	1.78449e-35	75.5786
PLPPR4	1.10894	7.13143	13.9736	5.36038e-38	1.85446e-35	75.5265
SVEP1	1.39669	9.38793	13.9456	7.14038e-38	2.43596e-35	75.243
ELN	1.58859	10.8221	13.9165	9.61974e-38	3.23684e-35	74.9483
ADAM12	1.72885	9.01876	13.8605	1.70667e-37	5.52888e-35	74.3814
FOLR2	1.172	10.1459	13.8603	1.71068e-37	5.52888e-35	74.3791
FLRT2	1.18317	8.17575	13.7957	3.3085e-37	1.05541e-34	73.7269
DCN	2.42737	10.6643	13.7648	4.53373e-37	1.40964e-34	73.4154
LHFP	1.02521	12.1225	13.544	4.26577e-36	1.20437e-33	71.1991
CCDC3	1.24508	10.3672	13.4631	9.65019e-36	2.69361e-33	70.3921
ACTA2	1.19128	14.2365	13.3852	2.11472e-35	5.77155e-33	69.6165
SLC24A3	1.23532	7.68832	13.3204	4.05461e-35	1.09443e-32	68.9731
F2R	1.03663	12.5906	13.2768	6.27886e-35	1.62345e-32	68.5408
IL33	1.11861	9.70701	13.27	6.72124e-35	1.71973e-32	68.4735
CTGF	1.24562	12.9944	13.2688	6.79918e-35	1.72174e-32	68.4621
LMOD1	1.25779	10.3725	13.226	1.04338e-34	2.56286e-32	68.0387
MMP2	1.29645	11.8612	13.1822	1.61616e-34	3.89194e-32	67.6062
CFH	1.5005	11.7134	13.1132	3.215e-34	7.59327e-32	66.9264
ADGRL3	1.25488	8.62625	13.0604	5.43869e-34	1.24851e-31	66.4068
ART4	1.12212	7.59827	12.9765	1.24939e-33	2.81548e-31	65.5848
GREM1	1.64568	7.24658	12.9298	1.98404e-33	4.39044e-31	65.1277
OR51E1	1.02267	8.84329	12.9097	2.41894e-33	5.30504e-31	64.9318
DACT3	1.00273	8.89742	12.908	2.45941e-33	5.34606e-31	64.9155
FMO3	1.32854	9.34879	12.9059	2.51156e-33	5.41154e-31	64.8947
HSPB6	1.46932	8.6461	12.8339	5.10851e-33	1.05446e-30	64.193
MGP	1.18169	13.8799	12.828	5.41305e-33	1.10801e-30	64.1358
MFAP4	1.98191	9.98554	12.7185	1.58765e-32	3.09503e-30	63.0725
FMOD	1.6764	10.1189	12.6539	2.98772e-32	5.64519e-30	62.4477
EDNRA	1.00081	10.8157	12.5718	6.6572e-32	1.22948e-29	61.6561
ADRA2A	1.2046	7.72639	12.5682	6.89507e-32	1.26391e-29	61.6214
EPHA3	1.16833	9.75866	12.4888	1.49201e-31	2.67505e-29	60.8587
MRGPRF	1.10636	7.44853	12.467	1.84471e-31	3.28345e-29	60.6491
IL2RA	1.11242	7.85449	12.4111	3.1691e-31	5.56019e-29	60.1145
LTBP1	1.21409	11.6648	12.4004	3.51617e-31	6.10281e-29	60.0118
OMD	1.07303	6.66147	12.4	3.52807e-31	6.10281e-29	60.0085
C7	2.24769	10.8915	12.3802	4.2748e-31	7.24152e-29	59.8188
DACT1	1.0631	8.94763	12.3562	5.38754e-31	9.00233e-29	59.5902
TNC	1.42663	12.3503	12.3264	7.179e-31	1.17558e-28	59.3066
CD93	1.0193	13.759	12.314	8.09408e-31	1.30799e-28	59.1881
SLIT3	1.20176	12.4537	12.3046	8.86524e-31	1.42325e-28	59.0982
CNN1	1.40553	10.1185	12.2866	1.05416e-30	1.68138e-28	58.9271
FBLN2	1.26292	10.9269	12.2747	1.18188e-30	1.84908e-28	58.8142
GGT5	1.13666	10.9215	12.1905	2.65062e-30	3.96995e-28	58.0163
TBX18	1.00897	7.19984	12.1862	2.76336e-30	4.11372e-28	57.9752
MMP16	1.13071	8.22313	12.1742	3.09891e-30	4.58546e-28	57.862
SFRP2	2.41049	9.55457	12.0883	7.04621e-30	1.02412e-27	57.0506
SGCD	1.2136	7.74933	12.0547	9.70684e-30	1.39432e-27	56.7342
COL16A1	1.27011	9.64392	11.9769	2.03303e-29	2.75896e-27	56.0041
SNAI1	1.01662	8.9006	11.9418	2.83485e-29	3.78437e-27	55.6757
EFEMP1	1.64222	11.9396	11.9338	3.05887e-29	4.06135e-27	55.6006
PDGFRB	1.01894	13.6295	11.8991	4.24872e-29	5.43548e-27	55.2761
NOTCH3	1.05957	13.9518	11.8471	6.9387e-29	8.69568e-27	54.7917
DPYSL3	1.11471	11.9522	11.8085	9.98367e-29	1.23853e-26	54.4325
DIO2	1.30149	7.87874	11.7515	1.70637e-28	2.06471e-26	53.9032
SELP	1.01452	9.12845	11.6986	2.80096e-28	3.33981e-26	53.4139
PDLIM3	1.02545	10.4204	11.5789	8.56606e-28	9.87832e-26	52.3102
MYOCD	1.07144	7.82019	11.5719	9.1355e-28	1.0437e-25	52.2467
NALCN	1.06254	6.99123	11.5544	1.07542e-27	1.22294e-25	52.0856
OGN	1.51624	7.15982	11.504	1.71683e-27	1.90961e-25	51.6238
MFAP5	1.26072	7.09581	11.5039	1.71813e-27	1.90961e-25	51.6231
SRPX	1.02554	8.27168	11.4972	1.82882e-27	2.01441e-25	51.5614
CHST1	1.23117	9.07062	11.4706	2.33958e-27	2.5541e-25	51.3183
COL11A1	1.6387	7.40752	11.4577	2.63548e-27	2.86439e-25	51.2008
MMP19	1.11625	8.7868	11.4464	2.9263e-27	3.15258e-25	51.0974
CDH11	1.02482	11.3792	11.4062	4.24104e-27	4.52925e-25	50.7311
FGF7	1.44704	7.36924	11.3553	6.78396e-27	7.03098e-25	50.2675
ACTG2	1.36536	10.1187	11.3305	8.51547e-27	8.75169e-25	50.0431
FBLN5	1.32433	11.1794	11.2676	1.51646e-26	1.50805e-24	49.4735
PLN	1.18235	10.2453	11.0489	1.11106e-25	1.02598e-23	47.5083
MIR4649	1.45176	13.9605	10.9296	3.25978e-25	2.90109e-23	46.4463
MOXD1	1.42727	8.88726	10.9175	3.63522e-25	3.21194e-23	46.3388
MYH11	1.43936	13.0512	10.7996	1.04453e-24	8.78661e-23	45.2976
NID2	1.00471	10.9343	10.7907	1.13041e-24	9.47656e-23	45.2197
COMP	1.50819	7.23416	10.6999	2.53581e-24	2.0422e-22	44.4228
IL7R	1.07961	10.3509	10.695	2.64983e-24	2.12012e-22	44.3794
VSIG4	1.0681	10.6693	10.6551	3.77126e-24	2.94074e-22	44.0314
PRND	1.38764	7.63556	10.5903	6.68466e-24	5.09923e-22	43.4669
COL8A1	1.07964	12.2932	10.5881	6.82038e-24	5.17065e-22	43.4471
TNXB	1.0392	9.42878	10.5735	7.75603e-24	5.8439e-22	43.3203
CD163	1.19144	11.8815	10.5577	8.90997e-24	6.67243e-22	43.1835
CCL19	1.42197	7.23627	10.5438	1.00651e-23	7.51457e-22	43.0633
CPXM1	1.26275	7.89176	10.5105	1.34892e-23	9.92018e-22	42.7746
VCAN	1.37324	13.6926	10.4856	1.67843e-23	1.22336e-21	42.5591
LAMA2	1.11808	8.69898	10.4647	2.01476e-23	1.45984e-21	42.379
FBLN1	1.19344	10.4032	10.4398	2.50573e-23	1.78401e-21	42.164
MFAP2	1.05231	7.39784	10.3708	4.57003e-23	3.15319e-21	41.5716
HMCN2	1.00741	8.33505	10.3623	4.92191e-23	3.37701e-21	41.4985
APLNR	1.16179	11.5542	10.2899	9.22391e-23	6.10692e-21	40.8793
DES	1.78743	8.09136	10.2632	1.16142e-22	7.52716e-21	40.6522
HGF	1.06104	9.74884	10.2609	1.18533e-22	7.64934e-21	40.6321
TMEM171	-1.07305	9.13529	-10.2465	1.34183e-22	8.58318e-21	40.5099
TGFBI	1.86114	14.9036	10.158	2.87437e-22	1.79196e-20	39.7591
ACTC1	1.22929	7.51706	10.0833	5.4491e-22	3.26455e-20	39.1288
KIAA1644	1.09172	7.05964	9.95421	1.63332e-21	9.30843e-20	38.0472
C1QTNF1	1.02151	11.3996	9.8926	2.7489e-21	1.53807e-19	37.5344
CREB3L1	1.21228	8.20635	9.83556	4.44289e-21	2.39848e-19	37.0615
BGN	1.04017	15.4515	9.81873	5.11717e-21	2.72653e-19	36.9223
NTRK3	1.00074	8.31964	9.77349	7.4752e-21	3.86554e-19	36.5491
CTSK	1.03984	9.85883	9.7139	1.22925e-20	6.11212e-19	36.0592
LOXL1	1.00855	9.15904	9.64429	2.19209e-20	1.03746e-18	35.4896
COL10A1	1.03961	6.6483	9.57223	3.97757e-20	1.82844e-18	34.903
CCL21	1.67093	7.70987	9.56372	4.26651e-20	1.95155e-18	34.834
SERPINF1	1.12397	10.9664	9.51063	6.60325e-20	2.93301e-18	34.4041
CYP1B1	1.18926	10.8227	9.46076	9.93709e-20	4.33543e-18	34.0018
C1R	1.24618	13.5029	9.36326	2.20005e-19	9.19044e-18	33.2196
ADH1B	1.52522	8.73831	9.31404	3.27907e-19	1.34016e-17	32.8269
NTM	1.1766	9.11473	9.22065	6.96393e-19	2.74567e-17	32.0859
ROR2	1.27446	8.0276	9.1946	8.58355e-19	3.33604e-17	31.8801
CPE	1.01353	13.3709	8.94707	6.13202e-18	2.18291e-16	29.9465
C1S	1.2565	13.7008	8.87434	1.08484e-17	3.79585e-16	29.3857
SSC5D	1.01076	9.38656	8.84932	1.31906e-17	4.5634e-16	29.1935
APCDD1L	1.13836	6.98899	8.74315	3.01023e-17	9.93822e-16	28.3827
F3	1.02077	8.45742	8.68628	4.66909e-17	1.50508e-15	27.9514
RFLNA	1.05677	7.03482	8.68429	4.74111e-17	1.52629e-15	27.9363
SCG2	1.09707	8.00912	8.53917	1.43946e-16	4.29097e-15	26.8454
PDE10A	1.16998	9.93979	8.41813	3.59676e-16	1.01432e-14	25.9462
PREX2	1.00188	11.1666	8.40478	3.9768e-16	1.11629e-14	25.8476
WISP2	1.19218	7.46848	8.26645	1.11787e-15	2.9532e-14	24.8332
CTHRC1	1.10427	9.8004	8.21972	1.58036e-15	4.07756e-14	24.4935
TMEM130	1.56005	9.59104	8.16791	2.31603e-15	5.85878e-14	24.1185
ACAN	1.08013	10.7353	8.16431	2.37814e-15	5.99735e-14	24.0925
CNTN1	1.03564	6.84279	8.1596	2.46206e-15	6.19627e-14	24.0585
MXRA5	1.01718	10.93	8.12908	3.08056e-15	7.69763e-14	23.8387
FLNC	1.14539	9.2402	8.11727	3.35908e-15	8.34267e-14	23.7538
IGF2	1.51525	10.0885	7.97298	9.59781e-15	2.21988e-13	22.7243
LINC01426	1.07978	8.90408	7.63074	1.09321e-13	2.20302e-12	20.3408
SERPINE1	1.11331	13.3713	7.60553	1.30348e-13	2.58e-12	20.1686
PLTP	1.01529	11.9432	7.55711	1.82534e-13	3.52482e-12	19.839
IL6	1.10152	7.56242	7.45618	3.66287e-13	6.78004e-12	19.1574
GRIN2A	1.18251	8.63075	7.33834	8.18425e-13	1.44107e-11	18.371
NPTX2	1.53904	11.8202	7.32151	9.17235e-13	1.60356e-11	18.2596
CLIC6	1.31729	8.3846	7.15187	2.86115e-12	4.61751e-11	17.1476
C5orf46	1.35756	8.33793	7.10465	3.91253e-12	6.18824e-11	16.8419
MMP9	1.12517	9.3276	7.06753	4.99799e-12	7.77982e-11	16.6027
JCHAIN	1.26885	11.314	7.03106	6.35117e-12	9.70776e-11	16.3687
LOX	1.12207	13.2907	7.01581	7.018e-12	1.06437e-10	16.2712
PGF	1.10731	12.2002	6.93591	1.18108e-11	1.72274e-10	15.7631
SMIM24	-1.03135	11.9111	-6.88713	1.6191e-11	2.3122e-10	15.4553
GPD1	-1.09764	10.746	-6.85383	2.00615e-11	2.81744e-10	15.2462
OGDHL	-1.01766	11.2919	-6.84782	2.08504e-11	2.91642e-10	15.2085
PKLR	-1.07301	9.28205	-6.69416	5.54168e-11	7.25975e-10	14.2554
IGLL5	1.21755	9.01913	6.65973	6.88197e-11	8.80886e-10	14.0443
TMEM174	-1.20568	8.52757	-6.50513	1.79988e-10	2.14614e-09	13.1078
SLC38A5	1.0012	8.12973	6.40682	3.28568e-10	3.72089e-09	12.5221
CHRDL1	1.06889	7.21793	6.29002	6.65175e-10	7.0976e-09	11.8362
LINC00671	-1.1765	8.80233	-6.28964	6.66677e-10	7.11055e-09	11.834
MIOX	-1.2036	10.9411	-6.22485	9.81405e-10	1.01772e-08	11.4581
SLC22A6	-1.37619	8.74047	-6.14415	1.58133e-09	1.58152e-08	10.9947
MMP7	1.17827	11.0047	5.78696	1.22798e-08	1.02841e-07	9.00705
CP	1.23224	13.287	5.53217	4.97828e-08	3.72469e-07	7.65332
PTHLH	1.12632	9.4901	5.43145	8.53271e-08	6.09802e-07	7.13311
SORCS3	1.13091	8.36754	5.20693	2.75248e-07	1.77219e-06	6.00437
PRIMA1	1.14282	9.58952	5.20151	2.83004e-07	1.81642e-06	5.97763
REN	-1.25677	9.64989	-5.08325	5.15473e-07	3.14886e-06	5.40094
SLC5A8	-1.0804	9.66952	-4.7986	2.081e-06	1.13389e-05	4.06233
SLC22A12	-1.09472	9.59135	-4.7579	2.52649e-06	1.3538e-05	3.87669
HMGCS2	-1.04677	9.29023	-4.73804	2.77599e-06	1.47654e-05	3.78661
CYP4A11	-1.17856	10.0565	-4.69423	3.41271e-06	1.78288e-05	3.58918
REG1A	1.09774	9.52167	4.60665	5.13192e-06	2.58204e-05	3.19954
HABP2	1.0706	9.45485	4.43358	1.12738e-05	5.29481e-05	2.44956
KRT19	1.05801	11.3705	4.32614	1.81419e-05	8.14363e-05	1.99736
FGG	1.01067	8.075	3.49392	0.000515835	0.00170623	-1.15108
