# Supplementary material for: Identification of transforming growth factor beta induced (TGFBI) as an immune-related prognostic factor in clear cell renal cell carcinoma (ccRCC)
Source: Aging (Albany NY). 2020 May 14;12(9):8484–505. doi: 10.18632/aging.103153 (PMC7244045; doi:10.18632/aging.103153)
Supplement: Supplementary Table 4 [file aging-12-103153-s003..xlsx]

## Sheet: GO-BP DEGs
Supplementary Table 4. GO biological processes of common DEGs.
ID	Description	BgRatio	pvalue	p.adjust	qvalue	geneID	Count
GO:0022407	regulation of cell-cell adhesion	389/17913	1.01992e-06	0.000445043	0.000214346	VSIG4/FGG/IL2RA/IL7R/CCL19/CCL21	6
GO:0002697	regulation of immune effector process	441/17913	2.1155e-06	0.000445043	0.000214346	VSIG4/IL2RA/IL7R/CCL19/C1R/C1S	6
GO:0071887	leukocyte apoptotic process	103/17913	2.31636e-06	0.000445043	0.000214346	IL2RA/IL7R/CCL19/CCL21	4
GO:0022409	positive regulation of cell-cell adhesion	251/17913	2.79901e-06	0.000445043	0.000214346	FGG/IL2RA/IL7R/CCL19/CCL21	5
GO:0007162	negative regulation of cell adhesion	271/17913	4.07271e-06	0.000518049	0.000249507	VSIG4/FGG/IL2RA/CCL21/TGFBI	5
GO:1903037	regulation of leukocyte cell-cell adhesion	295/17913	6.16016e-06	0.000652977	0.000314492	VSIG4/IL2RA/IL7R/CCL19/CCL21	5
GO:0050863	regulation of T cell activation	307/17913	7.47854e-06	0.000674339	0.000324781	VSIG4/IL2RA/IL7R/CCL19/CCL21	5
GO:0007159	leukocyte cell-cell adhesion	328/17913	1.03101e-05	0.000674339	0.000324781	VSIG4/IL2RA/IL7R/CCL19/CCL21	5
GO:2000107	negative regulation of leukocyte apoptotic process	46/17913	1.05087e-05	0.000674339	0.000324781	IL7R/CCL19/CCL21	3
GO:0072376	protein activation cascade	151/17913	1.06028e-05	0.000674339	0.000324781	VSIG4/FGG/C1R/C1S	4
GO:0022408	negative regulation of cell-cell adhesion	169/17913	1.65337e-05	0.000955946	0.000460411	VSIG4/FGG/IL2RA/CCL21	4
GO:0045785	positive regulation of cell adhesion	388/17913	2.31953e-05	0.00122935	0.000592092	FGG/IL2RA/IL7R/CCL19/CCL21	5
GO:0051249	regulation of lymphocyte activation	401/17913	2.7173e-05	0.00132939	0.00064027	VSIG4/IL2RA/IL7R/CCL19/CCL21	5
GO:0050870	positive regulation of T cell activation	198/17913	3.07912e-05	0.00134353	0.000647081	IL2RA/IL7R/CCL19/CCL21	4
GO:0001768	establishment of T cell polarity	10/17913	3.79777e-05	0.00134353	0.000647081	CCL19/CCL21	2
GO:1903039	positive regulation of leukocyte cell-cell adhesion	214/17913	4.17216e-05	0.00134353	0.000647081	IL2RA/IL7R/CCL19/CCL21	4
GO:0042110	T cell activation	443/17913	4.37669e-05	0.00134353	0.000647081	VSIG4/IL2RA/IL7R/CCL19/CCL21	5
GO:0001767	establishment of lymphocyte polarity	11/17913	4.63913e-05	0.00134353	0.000647081	CCL19/CCL21	2
GO:0002604	regulation of dendritic cell antigen processing and presentation	11/17913	4.63913e-05	0.00134353	0.000647081	CCL19/CCL21	2
GO:0097048	dendritic cell apoptotic process	11/17913	4.63913e-05	0.00134353	0.000647081	CCL19/CCL21	2
GO:2000668	regulation of dendritic cell apoptotic process	11/17913	4.63913e-05	0.00134353	0.000647081	CCL19/CCL21	2
GO:0002526	acute inflammatory response	220/17913	4.64742e-05	0.00134353	0.000647081	VSIG4/C1R/C1S/CD163	4
GO:0002468	dendritic cell antigen processing and presentation	12/17913	5.56385e-05	0.00153853	0.000740998	CCL19/CCL21	2
GO:2000106	regulation of leukocyte apoptotic process	82/17913	6.00262e-05	0.001553	0.000747969	IL7R/CCL19/CCL21	3
GO:0045582	positive regulation of T cell differentiation	83/17913	6.22407e-05	0.001553	0.000747969	IL2RA/IL7R/CCL19	3
GO:0050727	regulation of inflammatory response	479/17913	6.34874e-05	0.001553	0.000747969	VSIG4/IL2RA/SERPINF1/C1R/C1S	5
GO:0046651	lymphocyte proliferation	244/17913	6.95301e-05	0.00158101	0.000761459	VSIG4/IL2RA/IL7R/CCL19	4
GO:0032943	mononuclear cell proliferation	246/17913	7.17686e-05	0.00158101	0.000761459	VSIG4/IL2RA/IL7R/CCL19	4
GO:0002694	regulation of leukocyte activation	492/17913	7.209e-05	0.00158101	0.000761459	VSIG4/IL2RA/IL7R/CCL19/CCL21	5
GO:0001771	immunological synapse formation	14/17913	7.66281e-05	0.00162451	0.000782413	CCL19/CCL21	2
GO:0051251	positive regulation of lymphocyte activation	258/17913	8.6323e-05	0.00173688	0.000836529	IL2RA/IL7R/CCL19/CCL21	4
GO:0045621	positive regulation of lymphocyte differentiation	93/17913	8.739e-05	0.00173688	0.000836529	IL2RA/IL7R/CCL19	3
GO:0070661	leukocyte proliferation	270/17913	0.000102923	0.0019836	0.00095536	VSIG4/IL2RA/IL7R/CCL19	4
GO:0006959	humoral immune response	276/17913	0.000112042	0.00209585	0.00100942	VSIG4/JCHAIN/C1R/C1S	4
GO:0002577	regulation of antigen processing and presentation	19/17913	0.000143592	0.00248931	0.00119892	CCL19/CCL21	2
GO:0002460	adaptive immune response based on somatic recombination of immune receptors built from immunoglobulin superfamily domains	295/17913	0.000144819	0.00248931	0.00119892	IL7R/CCL19/C1R/C1S	4
GO:0016485	protein processing	295/17913	0.000144819	0.00248931	0.00119892	VSIG4/FGG/C1R/C1S	4
GO:0006898	receptor-mediated endocytosis	301/17913	0.000156479	0.0025501	0.0012282	JCHAIN/CCL19/CCL21/CD163	4
GO:0010560	positive regulation of glycoprotein biosynthetic process	20/17913	0.000159458	0.0025501	0.0012282	CCL19/CCL21	2
GO:0002696	positive regulation of leukocyte activation	305/17913	0.000164622	0.0025501	0.0012282	IL2RA/IL7R/CCL19/CCL21	4
GO:0002698	negative regulation of immune effector process	116/17913	0.000168403	0.0025501	0.0012282	VSIG4/IL2RA/IL7R	3
GO:0030449	regulation of complement activation	116/17913	0.000168403	0.0025501	0.0012282	VSIG4/C1R/C1S	3
GO:2000257	regulation of protein activation cascade	117/17913	0.000172733	0.00255484	0.00123049	VSIG4/C1R/C1S	3
GO:1903038	negative regulation of leukocyte cell-cell adhesion	121/17913	0.000190778	0.00270379	0.00130222	VSIG4/IL2RA/CCL21	3
GO:0034695	response to prostaglandin E	22/17913	0.000193651	0.00270379	0.00130222	CCL19/CCL21	2
GO:0050867	positive regulation of cell activation	319/17913	0.000195557	0.00270379	0.00130222	IL2RA/IL7R/CCL19/CCL21	4
GO:0006956	complement activation	128/17913	0.000225224	0.0029398	0.00141589	VSIG4/C1R/C1S	3
GO:0002407	dendritic cell chemotaxis	24/17913	0.000231117	0.0029398	0.00141589	CCL19/CCL21	2
GO:0090023	positive regulation of neutrophil chemotaxis	24/17913	0.000231117	0.0029398	0.00141589	CCL19/CCL21	2
GO:1903020	positive regulation of glycoprotein metabolic process	24/17913	0.000231117	0.0029398	0.00141589	CCL19/CCL21	2
GO:0002920	regulation of humoral immune response	135/17913	0.000263474	0.00328567	0.00158247	VSIG4/C1R/C1S	3
GO:0071624	positive regulation of granulocyte chemotaxis	26/17913	0.000271845	0.00332487	0.00160135	CCL19/CCL21	2
GO:0045580	regulation of T cell differentiation	139/17913	0.000287106	0.00333251	0.00160503	IL2RA/IL7R/CCL19	3
GO:0051604	protein maturation	353/17913	0.000287981	0.00333251	0.00160503	VSIG4/FGG/C1R/C1S	4
GO:0036336	dendritic cell migration	27/17913	0.000293428	0.00333251	0.00160503	CCL19/CCL21	2
GO:1902624	positive regulation of neutrophil migration	27/17913	0.000293428	0.00333251	0.00160503	CCL19/CCL21	2
GO:0050777	negative regulation of immune response	143/17913	0.00031207	0.003422	0.00164814	VSIG4/IL2RA/IL7R	3
GO:1902107	positive regulation of leukocyte differentiation	143/17913	0.00031207	0.003422	0.00164814	IL2RA/IL7R/CCL19	3
GO:0042129	regulation of T cell proliferation	149/17913	0.000352082	0.00378516	0.00182304	VSIG4/IL2RA/CCL19	3
GO:0034694	response to prostaglandin	30/17913	0.000363042	0.00378516	0.00182304	CCL19/CCL21	2
GO:0090022	regulation of neutrophil chemotaxis	30/17913	0.000363042	0.00378516	0.00182304	CCL19/CCL21	2
GO:0043552	positive regulation of phosphatidylinositol 3-kinase activity	32/17913	0.00041349	0.00424161	0.00204288	CCL19/CCL21	2
GO:0002673	regulation of acute inflammatory response	160/17913	0.00043376	0.00437891	0.00210901	VSIG4/C1R/C1S	3
GO:0045619	regulation of lymphocyte differentiation	164/17913	0.000466232	0.00457094	0.00220149	IL2RA/IL7R/CCL19	3
GO:1902622	regulation of neutrophil migration	34/17913	0.000467155	0.00457094	0.00220149	CCL19/CCL21	2
GO:0048469	cell maturation	167/17913	0.000491586	0.0047371	0.00228152	FGG/CCL19/CCL21	3
GO:0090218	positive regulation of lipid kinase activity	36/17913	0.000524028	0.00497436	0.00239579	CCL19/CCL21	2
GO:0070613	regulation of protein processing	173/17913	0.00054492	0.0050966	0.00245467	VSIG4/C1R/C1S	3
GO:1903317	regulation of protein maturation	175/17913	0.000563489	0.0051939	0.00250153	VSIG4/C1R/C1S	3
GO:0042098	T cell proliferation	177/17913	0.00058246	0.00523219	0.00251997	VSIG4/IL2RA/CCL19	3
GO:0010559	regulation of glycoprotein biosynthetic process	38/17913	0.000584097	0.00523219	0.00251997	CCL19/CCL21	2
GO:1903708	positive regulation of hemopoiesis	182/17913	0.00063167	0.00557975	0.00268737	IL2RA/IL7R/CCL19	3
GO:0070374	positive regulation of ERK1 and ERK2 cascade	186/17913	0.0006729	0.00586253	0.00282356	FGG/CCL19/CCL21	3
GO:0050866	negative regulation of cell activation	187/17913	0.00068347	0.00587415	0.00282916	VSIG4/FGG/IL2RA	3
GO:1901654	response to ketone	191/17913	0.000726812	0.00608549	0.00293095	SERPINF1/CCL19/CCL21	3
GO:0002683	negative regulation of immune system process	451/17913	0.000727197	0.00608549	0.00293095	VSIG4/IL2RA/IL7R/CCL21	4
GO:0071622	regulation of granulocyte chemotaxis	44/17913	0.00078337	0.00647043	0.00311634	CCL19/CCL21	2
GO:0050670	regulation of lymphocyte proliferation	199/17913	0.000818689	0.00659627	0.00317695	VSIG4/IL2RA/CCL19	3
GO:1903018	regulation of glycoprotein metabolic process	45/17913	0.000819348	0.00659627	0.00317695	CCL19/CCL21	2
GO:0032944	regulation of mononuclear cell proliferation	200/17913	0.000830668	0.00660381	0.00318058	VSIG4/IL2RA/CCL19	3
GO:0031638	zymogen activation	46/17913	0.000856114	0.0066401	0.00319806	FGG/C1R	2
GO:0070231	T cell apoptotic process	46/17913	0.000856114	0.0066401	0.00319806	IL2RA/IL7R	2
GO:1903727	positive regulation of phospholipid metabolic process	48/17913	0.000932	0.00714159	0.00343959	CCL19/CCL21	2
GO:0048260	positive regulation of receptor-mediated endocytosis	49/17913	0.000971118	0.00735275	0.00354129	CCL19/CCL21	2
GO:0070663	regulation of leukocyte proliferation	214/17913	0.00101028	0.00755923	0.00364074	VSIG4/IL2RA/CCL19	3
GO:0042130	negative regulation of T cell proliferation	53/17913	0.00113539	0.00830009	0.00399756	VSIG4/IL2RA	2
GO:0043551	regulation of phosphatidylinositol 3-kinase activity	53/17913	0.00113539	0.00830009	0.00399756	CCL19/CCL21	2
GO:0031295	T cell costimulation	55/17913	0.00122219	0.00883308	0.00425426	CCL19/CCL21	2
GO:0031294	lymphocyte costimulation	56/17913	0.00126675	0.00905226	0.00435983	CCL19/CCL21	2
GO:0030217	T cell differentiation	234/17913	0.00130699	0.00923605	0.00444834	IL2RA/IL7R/CCL19	3
GO:0031348	negative regulation of defense response	237/17913	0.00135574	0.00947525	0.00456355	VSIG4/IL2RA/SERPINF1	3
GO:0030593	neutrophil chemotaxis	60/17913	0.00145269	0.0100425	0.00483677	CCL19/CCL21	2
GO:0043550	regulation of lipid kinase activity	62/17913	0.00155027	0.0106019	0.00510616	CCL19/CCL21	2
GO:0032945	negative regulation of mononuclear cell proliferation	65/17913	0.00170237	0.0113969	0.00548907	VSIG4/IL2RA	2
GO:0050672	negative regulation of lymphocyte proliferation	65/17913	0.00170237	0.0113969	0.00548907	VSIG4/IL2RA	2
GO:0021700	developmental maturation	262/17913	0.00180712	0.0118517	0.00570811	FGG/CCL19/CCL21	3
GO:0070227	lymphocyte apoptotic process	67/17913	0.00180757	0.0118517	0.00570811	IL2RA/IL7R	2
GO:0042698	ovulation cycle	68/17913	0.0018613	0.0120795	0.00581782	MMP7/SERPINF1	2
GO:1902105	regulation of leukocyte differentiation	267/17913	0.00190738	0.0121845	0.00586839	IL2RA/IL7R/CCL19	3
GO:0009988	cell-cell recognition	69/17913	0.0019158	0.0121845	0.00586839	CCL19/CCL21	2
GO:0070372	regulation of ERK1 and ERK2 cascade	271/17913	0.00199005	0.0125314	0.00603548	FGG/CCL19/CCL21	3
GO:0070664	negative regulation of leukocyte proliferation	71/17913	0.00202705	0.0126392	0.00608741	VSIG4/IL2RA	2
GO:1990266	neutrophil migration	72/17913	0.0020838	0.012867	0.0061971	CCL19/CCL21	2
GO:0070371	ERK1 and ERK2 cascade	289/17913	0.0023898	0.0146145	0.00703877	FGG/CCL19/CCL21	3
GO:0002449	lymphocyte mediated immunity	293/17913	0.00248492	0.0150515	0.00724923	IL7R/C1R/C1S	3
GO:0002690	positive regulation of leukocyte chemotaxis	81/17913	0.00262822	0.0157693	0.00759496	CCL19/CCL21	2
GO:0071621	granulocyte chemotaxis	84/17913	0.00282305	0.01678	0.00808172	CCL19/CCL21	2
GO:0070542	response to fatty acid	85/17913	0.00288946	0.0170157	0.00819526	CCL19/CCL21	2
GO:1903725	regulation of phospholipid metabolic process	86/17913	0.00295661	0.0172514	0.00830878	CCL19/CCL21	2
GO:0042102	positive regulation of T cell proliferation	90/17913	0.00323252	0.0186899	0.00900158	IL2RA/CCL19	2
GO:0006958	complement activation, classical pathway	91/17913	0.00330332	0.0189181	0.00911152	C1R/C1S	2
GO:0030098	lymphocyte differentiation	325/17913	0.0033315	0.0189181	0.00911152	IL2RA/IL7R/CCL19	3
GO:0001101	response to acid chemical	330/17913	0.0034779	0.0195747	0.00942775	SERPINF1/CCL19/CCL21	3
GO:0120034	positive regulation of plasma membrane bounded cell projection assembly	95/17913	0.00359378	0.0200495	0.00965641	CCL19/CCL21	2
